# Supplementary material for: Comparative genomic analysis identifies X-factor (haemin)-independent Haemophilus haemolyticus: a formal re-classification of 'Haemophilus intermedius'
Source: PubMed Central journal article supplement (PMC7067038; doi:10.1099/mgen.0.000303), 2019-12-20
Supplement: mgen-6-303-s001.pdf [file mgen-6-303-s001.pdf]

**Table S1.** *Haemophilus* genomes used in this study.

| Strain       | Source                 | Original species designation    | Revised species designation                             | Alternative strain ID | Haemolysis | Accession number         | Country of origin | Reference |
|--------------|------------------------|---------------------------------|---------------------------------------------------------|-----------------------|------------|--------------------------|-------------------|-----------|
| 11P18        | Nasopharynx            | <i>Haemophilus haemolyticus</i> | ---                                                     | N/A                   | Unknown    | NZ_LCTK01000000          | USA               | (25)      |
| 1P26         | Nasopharynx            | <i>Haemophilus haemolyticus</i> | ---                                                     | N/A                   | Unknown    | NZ_LCTI00000000          | USA               | (25)      |
| 27P25        | Nasopharynx            | <i>Haemophilus haemolyticus</i> | ---                                                     | N/A                   | Unknown    | NZ_LCTH00000000          | USA               | (25)      |
| 3P5          | Nasopharynx            | <i>Haemophilus haemolyticus</i> | ---                                                     | N/A                   | Unknown    | NZ_LCTJ00000000          | USA               | (25)      |
| 60041 B Hi-1 | Bronchoalveolar lavage | <i>Haemophilus haemolyticus</i> | ---                                                     | N/A                   | Negative   | SRR8294020               | Australia         | (18)      |
| 60049 B Hi-3 | Bronchoalveolar lavage | <i>Haemophilus haemolyticus</i> | ---                                                     | N/A                   | Positive   | SRR8294019               | Australia         | (18)      |
| 60262 B Hi-3 | Bronchoalveolar lavage | <i>Haemophilus haemolyticus</i> | ---                                                     | N/A                   | Negative   | SRR2148852               | Australia         | (17)      |
| 60303 B Hi-2 | Bronchoalveolar lavage | <i>Haemophilus haemolyticus</i> | ---                                                     | N/A                   | Negative   | SRR2148853               | Australia         | (17)      |
| 60303 T Hi-1 | Throat                 | <i>Haemophilus haemolyticus</i> | ---                                                     | N/A                   | Negative   | SRR8294022               | Australia         | (18)      |
| 60317 T Hi-3 | Throat                 | <i>Haemophilus haemolyticus</i> | ---                                                     | N/A                   | Positive   | SRR8294021               | Australia         | (18)      |
| 60370 B Hi-3 | Bronchoalveolar lavage | <i>Haemophilus haemolyticus</i> | ---                                                     | N/A                   | Positive   | SRR2148854               | Australia         | (17)      |
| 60370 T Hi-4 | Throat                 | <i>Haemophilus haemolyticus</i> | ---                                                     | N/A                   | Positive   | SRR8294024               | Australia         | (18)      |
| 60488 T Hi-1 | Throat                 | <i>Haemophilus haemolyticus</i> | ---                                                     | N/A                   | Positive   | SRR8294023               | Australia         | (18)      |
| 60555 T Hi-1 | Throat                 | <i>Haemophilus haemolyticus</i> | ---                                                     | N/A                   | Negative   | SRR8294026               | Australia         | (18)      |
| 60577 B Hi-4 | Bronchoalveolar lavage | <i>Haemophilus haemolyticus</i> | ---                                                     | N/A                   | Negative   | SRR8294025               | Australia         | (18)      |
| 60578 B Hi-4 | Bronchoalveolar lavage | <i>Haemophilus haemolyticus</i> | ---                                                     | N/A                   | Negative   | SRR8294018               | Australia         | (18)      |
| 60819 B Hi-1 | Bronchoalveolar lavage | <i>Haemophilus haemolyticus</i> | <i>Haemophilus haemolyticus</i><br>(haemin independent) | N/A                   | Positive   | SRR8294017, SDPA00000000 | Australia         | (18)      |
| 60824 B Hi-4 | Bronchoalveolar lavage | <i>Haemophilus haemolyticus</i> | <i>Haemophilus haemolyticus</i><br>(haemin independent) | N/A                   | Positive   | SRR8294040, SDPB00000000 | Australia         | (18)      |
| 60884 T Hi-2 | Throat                 | <i>Haemophilus haemolyticus</i> | ---                                                     | N/A                   | Positive   | SRR8294039               | Australia         | (18)      |
| 60971 B Hi-3 | Bronchoalveolar lavage | <i>Haemophilus haemolyticus</i> | <i>Haemophilus haemolyticus</i><br>(haemin independent) | N/A                   | Positive   | SRR8294038, SDPC00000000 | Australia         | (18)      |
| 60982 B Hi-1 | Bronchoalveolar lavage | <i>Haemophilus haemolyticus</i> | <i>Haemophilus haemolyticus</i><br>(haemin independent) | N/A                   | Negative   | SRR8294037, SDPD00000000 | Australia         | (18)      |
| 61005 T Hi-1 | Throat                 | <i>Haemophilus haemolyticus</i> | ---                                                     | N/A                   | Negative   | SRR8294044               | Australia         | (18)      |

| Strain       | Source                 | Original species designation                                | Revised species designation                             | Alternative strain ID | Haemolysis | Accession number         | Country of origin | Reference |
|--------------|------------------------|-------------------------------------------------------------|---------------------------------------------------------|-----------------------|------------|--------------------------|-------------------|-----------|
| 61019 B Hi-4 | Bronchoalveolar lavage | <i>Haemophilus haemolyticus</i>                             | ---                                                     | N/A                   | Negative   | SRR8294043               | Australia         | (18)      |
| 61053 T Hi-1 | Throat                 | <i>Haemophilus haemolyticus</i>                             | ---                                                     | N/A                   | Negative   | SRR8294042               | Australia         | (18)      |
| 61054 T Hi-2 | Throat                 | <i>Haemophilus haemolyticus</i>                             | ---                                                     | N/A                   | Negative   | SRR8294041               | Australia         | (18)      |
| 61057 T Hi-5 | Throat                 | <i>Haemophilus haemolyticus</i>                             | ---                                                     | N/A                   | Negative   | SRR8294046               | Australia         | (18)      |
| 61061 B Hi-4 | Bronchoalveolar lavage | <i>Haemophilus haemolyticus</i>                             | ---                                                     | N/A                   | Positive   | SRR8294045               | Australia         | (18)      |
| 61072 B Hi-1 | Bronchoalveolar lavage | <i>Haemophilus haemolyticus</i>                             | ---                                                     | N/A                   | Negative   | SRR8294004               | Australia         | (18)      |
| 61072 B Hi-4 | Bronchoalveolar lavage | <i>Haemophilus haemolyticus</i>                             | ---                                                     | N/A                   | Negative   | SRR8294005               | Australia         | (18)      |
| 61077 B Hi-1 | Bronchoalveolar lavage | <i>Haemophilus haemolyticus</i>                             | ---                                                     | N/A                   | Negative   | SRR8294002               | Australia         | (18)      |
| 65117 B Hi-3 | Bronchoalveolar lavage | <i>Haemophilus haemolyticus</i>                             | <i>Haemophilus haemolyticus</i><br>(haemin independent) | N/A                   | Negative   | SRR8294003, SDPE00000000 | Australia         | (18)      |
| 65123 T Hi-3 | Throat                 | <i>Haemophilus haemolyticus</i>                             | ---                                                     | N/A                   | Positive   | SRR8294008               | Australia         | (18)      |
| 65141 B Hi-3 | Bronchoalveolar lavage | <i>Haemophilus haemolyticus</i>                             | ---                                                     | N/A                   | Positive   | SRR8294009               | Australia         | (18)      |
| 65151 B Hi-4 | Bronchoalveolar lavage | <i>Haemophilus haemolyticus</i>                             | <i>Haemophilus haemolyticus</i><br>(haemin independent) | N/A                   | Negative   | SRR8294006, SDPF00000000 | Australia         | (18)      |
| 839_HINF*    | Bronchoalveolar lavage | <i>Haemophilus influenzae</i>                               | <i>Haemophilus haemolyticus</i><br>(haemin independent) | N/A                   |            | NZ_JURC00000000          | USA               | (24)      |
| 88002 N Hi-1 | Nasopharynx            | <i>Haemophilus haemolyticus</i>                             | ---                                                     | N/A                   | ND         | SRR8294007               | Australia         | (18)      |
| 90691 N Hi-1 | Nasopharynx            | <i>Haemophilus haemolyticus</i>                             | ---                                                     | N/A                   | Negative   | SRR8294000               | Australia         | (18)      |
| ATCC 33390   | Sputum                 | <i>Haemophilus haemolyticus</i>                             | ---                                                     | Hh33390; NCTC 10659   | Negative   | SRR8294001               | UK                | (18)      |
| C1*          | Bronchoalveolar lavage | <i>Haemophilus</i> sp.                                      | <i>Haemophilus haemolyticus</i>                         | N/A                   |            | NZ_LDZV00000000          | Australia         | (23)      |
| CCUG 11096*  | Pleural fluid          | <i>Haemophilus intermedius</i> subsp.<br><i>intermedius</i> | <i>Haemophilus haemolyticus</i><br>(haemin independent) | N/A                   |            | SRR8294030, SDPG00000000 | Sweden            | (3)       |
| CCUG 15949*  | Eye                    | <i>Haemophilus intermedius</i> subsp.<br><i>intermedius</i> | <i>Haemophilus haemolyticus</i><br>(haemin independent) | N/A                   |            | SRR8294029, SDPH00000000 | Sweden            | (3)       |
| CCUG 30218*  | Cerebrospinal fluid    | <i>Haemophilus intermedius</i> subsp.<br><i>intermedius</i> | <i>Haemophilus haemolyticus</i><br>(haemin independent) | N/A                   |            | SRR8294032, SDPI00000000 | Sweden            | (3)       |
| CCUG 31732*  | Ascitic fluid          | <i>Haemophilus intermedius</i> subsp.<br><i>intermedius</i> | <i>Haemophilus haemolyticus</i><br>(haemin independent) | N/A                   |            | SRR8294031, SDPJ00000000 | Sweden            | (3)       |

| Strain      | Source                 | Original species designation                                | Revised species designation                             | Alternative strain ID       | Haemolysis | Accession number         | Country of origin | Reference   |
|-------------|------------------------|-------------------------------------------------------------|---------------------------------------------------------|-----------------------------|------------|--------------------------|-------------------|-------------|
| CCUG 66565* | ---                    | <i>Haemophilus</i> sp.                                      | <i>Haemophilus haemolyticus</i><br>(haemin independent) | N/A                         |            | LZOX00000000             | Sweden            | Unpublished |
| F0397*      | ---                    | <i>Haemophilus</i> sp.                                      | <i>Haemophilus haemolyticus</i>                         | oral taxon 851 strain F0397 | Unknown    | AGRK01000000             | USA               | Unpublished |
| F0629*      | ---                    | <i>Haemophilus</i> sp.                                      | <i>Haemophilus haemolyticus</i><br>(haemin independent) | oral taxon 036 strain F0629 | Unknown    | NZ_CP027235.1            | USA               | Unpublished |
| H12         | Nasopharynx            | <i>Haemophilus haemolyticus</i>                             | ---                                                     | N/A                         | Negative   | SRR8294034               | Australia         | (18)        |
| H187        | Nasopharynx            | <i>Haemophilus haemolyticus</i>                             | ---                                                     | N/A                         | Negative   | SRR8294033               | Australia         | (18)        |
| H19         | Nasopharynx            | <i>Haemophilus haemolyticus</i>                             | ---                                                     | N/A                         | Negative   | SRR8294036               | Australia         | (18)        |
| H274        | Nasopharynx            | <i>Haemophilus haemolyticus</i>                             | ---                                                     | N/A                         | Positive   | SRR8294035               | Australia         | (18)        |
| H42         | Nasopharynx            | <i>Haemophilus haemolyticus</i>                             | ---                                                     | N/A                         | Negative   | SRR8294028               | Australia         | (18)        |
| H51         | Nasopharynx            | <i>Haemophilus haemolyticus</i>                             | ---                                                     | N/A                         | Negative   | SRR8294027               | Australia         | (18)        |
| H54         | Nasopharynx            | <i>Haemophilus haemolyticus</i>                             | ---                                                     | N/A                         | Negative   | SRR8294010               | Australia         | (18)        |
| H56         | Nasopharynx            | <i>Haemophilus haemolyticus</i>                             | ---                                                     | N/A                         | Negative   | SRR8294011               | Australia         | (18)        |
| H6          | Nasopharynx            | <i>Haemophilus haemolyticus</i>                             | ---                                                     | N/A                         | Positive   | SRR8294012               | Australia         | (18)        |
| H9          | Nasopharynx            | <i>Haemophilus haemolyticus</i>                             | ---                                                     | N/A                         | Negative   | SRR8294013               | Australia         | (18)        |
| HI2028      | Blood                  | <i>Haemophilus haemolyticus</i>                             | ---                                                     | N/A                         | Negative   | SRR8294014               | USA               | (18)        |
| Hi-S080     | Blood                  | <i>Haemophilus haemolyticus</i>                             | ---                                                     | N/A                         | Unknown    | SRR8294015               | Australia         | (18)        |
| M19107      | Oropharynx             | <i>Haemophilus haemolyticus</i>                             | ---                                                     | N/A                         | Unknown    | NZ_AFN000000000          | USA               | (22)        |
| M19501      | Oropharynx             | <i>Haemophilus haemolyticus</i>                             | ---                                                     | N/A                         | Unknown    | NZ_AFN000000000          | USA               | (22)        |
| M21127      | Blood                  | <i>Haemophilus haemolyticus</i>                             | ---                                                     | N/A                         | Unknown    | NZ_AFP000000000          | USA               | (22)        |
| M21621      | Knee fluid             | <i>Haemophilus haemolyticus</i>                             | ---                                                     | N/A                         | Unknown    | NZ_AFQQ000000000         | USA               | (22)        |
| M21639      | Blood                  | <i>Haemophilus haemolyticus</i>                             | ---                                                     | N/A                         | Unknown    | NZ_AFQR000000000         | USA               | (22)        |
| PN24*       | Urine                  | <i>Haemophilus intermedius</i> subsp.<br><i>intermedius</i> | <i>Haemophilus haemolyticus</i><br>(haemin independent) | N/A                         |            | SRR8294016, SDPK00000000 | Denmark           | (3)         |
| 1128_HPAR   | Bronchial brush        | <i>Haemophilus parainfluenzae</i>                           | ---                                                     | N/A                         |            | JWCE00000000             | USA               | (24)        |
| 1209_HPAR   | Bronchoalveolar lavage | <i>Haemophilus parainfluenzae</i>                           | ---                                                     | N/A                         |            | JVYT00000000             | USA               | (24)        |
| 137_HINF*   | Bronchoalveolar lavage | <i>Haemophilus influenzae</i>                               | <i>Haemophilus parainfluenzae</i>                       | N/A                         |            | JVSU00000000             | USA               | (24)        |
| 146_HPAR    | Bronchoalveolar lavage | <i>Haemophilus parainfluenzae</i>                           | ---                                                     | N/A                         |            | JVSL00000000             | USA               | (24)        |

| Strain        | Source                 | Original species designation      | Revised species designation       | Alternative strain ID                              | Haemolysis | Accession number | Country of origin | Reference   |
|---------------|------------------------|-----------------------------------|-----------------------------------|----------------------------------------------------|------------|------------------|-------------------|-------------|
| 155_HPAR      | Bronchoalveolar lavage | <i>Haemophilus parainfluenzae</i> | ---                               | N/A                                                |            | JVSB00000000     | USA               | (24)        |
| 156_HINF*     | ---                    | <i>Haemophilus influenzae</i>     | <i>Haemophilus parainfluenzae</i> | N/A                                                |            | JVSA00000000     | USA               | (24)        |
| 159_HINF*     | ---                    | <i>Haemophilus influenzae</i>     | <i>Haemophilus parainfluenzae</i> | N/A                                                |            | JVRW00000000     | USA               | (24)        |
| 167_HINF*     | Wound                  | <i>Haemophilus influenzae</i>     | <i>Haemophilus parainfluenzae</i> | N/A                                                |            | JVRO00000000     | USA               | (24)        |
| 174_HPAR      | Bronchoalveolar lavage | <i>Haemophilus parainfluenzae</i> | ---                               | N/A                                                |            | JVRH00000000     | USA               | (24)        |
| 209_HPAR      | Bronchoalveolar lavage | <i>Haemophilus parainfluenzae</i> | ---                               | N/A                                                |            | JVPX00000000     | USA               | (24)        |
| 215035-2-IS05 | ---                    | <i>Haemophilus parainfluenzae</i> | ---                               | N/A                                                |            | LFXN01000000     | USA               | Unpublished |
| 432_HPAR      | Bronchoalveolar lavage | <i>Haemophilus parainfluenzae</i> | ---                               | N/A                                                |            | JVHG00000000     | USA               | (24)        |
| 488_HPAR      | Bronchoalveolar lavage | <i>Haemophilus parainfluenzae</i> | ---                               | N/A                                                |            | JVFE00000000     | USA               | (24)        |
| 60884 B Hi-2  | Bronchoalveolar lavage | <i>Haemophilus parainfluenzae</i> | ---                               | N/A                                                |            | MPJJ00000000     | Australia         | (18)        |
| 65114 B Hi-3  | Bronchoalveolar lavage | <i>Haemophilus parainfluenzae</i> | ---                               | N/A                                                |            | MPJK00000000     | Australia         | (18)        |
| 777_HPAR      | Bronchoalveolar lavage | <i>Haemophilus parainfluenzae</i> | ---                               | N/A                                                |            | JUTJ00000000     | USA               | (24)        |
| 781_HINF*     | Bronchoalveolar lavage | <i>Haemophilus influenzae</i>     | <i>Haemophilus parainfluenzae</i> | N/A                                                |            | JUTE00000000     | USA               | (24)        |
| 841_HINF*     | Bronchoalveolar lavage | <i>Haemophilus influenzae</i>     | <i>Haemophilus parainfluenzae</i> | N/A                                                |            | JUQZ00000000     | USA               | (24)        |
| 901_HPAR      | Bronchoalveolar lavage | <i>Haemophilus parainfluenzae</i> | ---                               | N/A                                                |            | JUOR00000000     | USA               | (24)        |
| ATCC 9796     | ---                    | <i>Haemophilus parainfluenzae</i> | ---                               | 655                                                |            | MAQD00000000     | Unknown           | (18)        |
| ATCC 33392    | ---                    | <i>Haemophilus parainfluenzae</i> | ---                               | NCTC 7857; DSM 8978; CIP 102513; CCUG 12836; HK409 |            | AEWU01000000     | Unknown           | Unpublished |
| HK2019        | ---                    | <i>Haemophilus parainfluenzae</i> | ---                               | N/A                                                |            | AJTC01000000     | Unknown           | Unpublished |
| HK262         | ---                    | <i>Haemophilus parainfluenzae</i> | ---                               | N/A                                                |            | AJMW01000000     | Unknown           | Unpublished |
| T3T1          | ---                    | <i>Haemophilus parainfluenzae</i> | ---                               | N/A                                                |            | NC_015964.1      | UK                | Unpublished |
| 3655          | Otitis media           | <i>Haemophilus influenzae</i>     | ---                               | CGSHI3655                                          |            | NZ_AAZF00000000  | USA               | (27)        |
| 10810         | ---                    | <i>Haemophilus influenzae</i>     | ---                               | N/A                                                |            | NC_016809        | Undetermined      | Unpublished |
| 1057_HINF     | Sputum                 | <i>Haemophilus influenzae</i>     | ---                               | N/A                                                |            | NZ_JWEN00000000  | USA               | (24)        |
| 1059_HINF     | Sputum                 | <i>Haemophilus influenzae</i>     | ---                               | N/A                                                |            | NZ_JWEL00000000  | USA               | (24)        |
| 1061_HINF     | ---                    | <i>Haemophilus influenzae</i>     | ---                               | N/A                                                |            | NZ_JWEJ00000000  | USA               | (24)        |
| 1123_HINF     | Bronchoalveolar lavage | <i>Haemophilus influenzae</i>     | ---                               | N/A                                                |            | NZ_JWCI00000000  | USA               | (24)        |
| 1124_HINF     | Bronchoalveolar lavage | <i>Haemophilus influenzae</i>     | ---                               | N/A                                                |            | NZ_JWCH00000000  | USA               | (24)        |
| 177_HINF      | Sputum                 | <i>Haemophilus influenzae</i>     | ---                               | N/A                                                |            | NZ_JVRF00000000  | USA               | (24)        |

| Strain        | Source                   | Original species designation      | Revised species designation   | Alternative strain ID | Haemolysis | Accession number | Country of origin | Reference   |
|---------------|--------------------------|-----------------------------------|-------------------------------|-----------------------|------------|------------------|-------------------|-------------|
| 22.1-21       | Nasopharynx              | <i>Haemophilus influenzae</i>     | ---                           | CGSHI22121            |            | AAZD00000000     | USA               | (27)        |
| 22.4-21       | Nasopharynx              | <i>Haemophilus influenzae</i>     | ---                           | CGSHI22421            |            | NZ_AA00000000    | USA               | (27)        |
| 40_HINF       | Sputum                   | <i>Haemophilus influenzae</i>     | ---                           | N/A                   |            | NZ_JVIR00000000  | USA               | (24)        |
| 492_HINF      | Sputum                   | <i>Haemophilus influenzae</i>     | ---                           | N/A                   |            | NZ_JVEZ00000000  | USA               | (24)        |
| 536_HINF      | Bronchoalveolar lavage   | <i>Haemophilus influenzae</i>     | ---                           | N/A                   |            | NZ_JVDE00000000  | USA               | (24)        |
| 552_HINF      | Bronchoalveolar lavage   | <i>Haemophilus influenzae</i>     | ---                           | N/A                   |            | NZ_JVCL00000000  | USA               | (24)        |
| 614_HPAR*     | Sputum                   | <i>Haemophilus parainfluenzae</i> | <i>Haemophilus influenzae</i> | N/A                   |            | NZ_JUZZ00000000  | USA               | (24)        |
| 615_HINF      | Sputum                   | <i>Haemophilus influenzae</i>     | ---                           | N/A                   |            | NZ_JUZY00000000  | USA               | (24)        |
| 6P18H1        | Sputum                   | <i>Haemophilus influenzae</i>     | ---                           | N/A                   |            | NZ_ABWW00000000  | USA               | (26)        |
| 7P49H1        | Sputum                   | <i>Haemophilus influenzae</i>     | ---                           | N/A                   |            | NZ_ABVV00000000  | USA               | (26)        |
| 86-028NP      | Nasopharynx              | <i>Haemophilus influenzae</i>     | ---                           | N/A                   |            | NC_007146        | USA               | (28)        |
| ATCC 11116    | ---                      | <i>Haemophilus influenzae</i>     | ---                           | CCUG 25716; NCTC 8502 |            | NZ_AFCO10000000  | USA               | Unpublished |
| ATCC 8142     | ---                      | <i>Haemophilus influenzae</i>     | ---                           | Gifu199; GTC_15022    |            | DRX014253        | USA               | Unpublished |
| ATCC 9007     | ---                      | <i>Haemophilus influenzae</i>     | ---                           | Gifu101; GTC_15020    |            | DRX014159        | USA               | Unpublished |
| ATCC 9327     | ---                      | <i>Haemophilus influenzae</i>     | ---                           | Gifu098; GTC_15021    |            | DRX014438        | USA               | Unpublished |
| ATCC 9332     | ---                      | <i>Haemophilus influenzae</i>     | ---                           | Gifu102; GTC_15019    |            | DRX014160        | Undetermined      | Unpublished |
| ATCC 9795     | ---                      | <i>Haemophilus influenzae</i>     | ---                           | Gifu100; GTC_15028    |            | DRX014158        | USA               | Unpublished |
| ATCC 9833     | ---                      | <i>Haemophilus influenzae</i>     | ---                           | Gifu103; GTC_15017    |            | DRX014161        | USA               | Unpublished |
| C10           | Bronchoalveolar lavage   | <i>Haemophilus influenzae</i>     | ---                           | N/A                   |            | NZ_LDWA00000000  | Australia         | (23)        |
| C486          | ---                      | <i>Haemophilus influenzae</i>     | ---                           | N/A                   |            | NZ_CP007471      | USA               | Unpublished |
| CGSHICZ412602 | ---                      | <i>Haemophilus influenzae</i>     | ---                           | N/A                   |            | CP007805         | Czech Republic    | Unpublished |
| DC7331102     | Invasive disease         | <i>Haemophilus influenzae</i>     | ---                           | N/A                   |            | ERR125109        | UK                | (36)        |
| F3031         | Brazilian purpuric fever | <i>Haemophilus influenzae</i>     | ---                           | N/A                   |            | NC_014920        | Brazil            | (29)        |
| F3047         | Conjunctivitis           | <i>Haemophilus influenzae</i>     | ---                           | N/A                   |            | NC_014922        | Brazil            | (29)        |
| GTC 15012     | ---                      | <i>Haemophilus influenzae</i>     | ---                           | Gifu099               |            | DRX014157        | Undetermined      | Unpublished |
| H18           | ---                      | <i>Haemophilus influenzae</i>     | ---                           | N/A                   |            | Unpublished      | Australia         | Unpublished |
| H180          | ---                      | <i>Haemophilus influenzae</i>     | ---                           | N/A                   |            | Unpublished      | Australia         | Unpublished |
| H40           | ---                      | <i>Haemophilus influenzae</i>     | ---                           | N/A                   |            | Unpublished      | Australia         | Unpublished |

| Strain | Source                                | Original species designation  | Revised species designation | Alternative strain ID | Haemolysis | Accession number | Country of origin | Reference   |
|--------|---------------------------------------|-------------------------------|-----------------------------|-----------------------|------------|------------------|-------------------|-------------|
| Hi1008 | Otitis media                          | <i>Haemophilus influenzae</i> | ---                         | N/A                   |            | ERR125030        | Finland           | (36)        |
| Hi11   | Carriage                              | <i>Haemophilus influenzae</i> | ---                         | N/A                   |            | ERR125052        | Finland           | (36)        |
| Hi1104 | Sputum                                | <i>Haemophilus influenzae</i> | ---                         | N/A                   |            | NZ_JFZM00000000  | Spain             | (30)        |
| Hi1124 | Otitis media                          | <i>Haemophilus influenzae</i> | ---                         | N/A                   |            | ERR125031        | Finland           | (36)        |
| Hi1158 | Otitis media                          | <i>Haemophilus influenzae</i> | ---                         | N/A                   |            | ERR125032        | Finland           | (36)        |
| Hi1180 | Otitis media                          | <i>Haemophilus influenzae</i> | ---                         | N/A                   |            | ERR125033        | Finland           | (36)        |
| Hi1200 | Otitis media                          | <i>Haemophilus influenzae</i> | ---                         | N/A                   |            | ERR125034        | Finland           | (36)        |
| Hi1207 | Otitis media                          | <i>Haemophilus influenzae</i> | ---                         | N/A                   |            | ERR125035        | Finland           | (36)        |
| Hi1209 | ---                                   | <i>Haemophilus influenzae</i> | ---                         | N/A                   |            | JMQP01000000     | Finland           | Unpublished |
| Hi1231 | Otitis media                          | <i>Haemophilus influenzae</i> | ---                         | N/A                   |            | ERR125036        | Finland           | (36)        |
| Hi1233 | Otitis media                          | <i>Haemophilus influenzae</i> | ---                         | N/A                   |            | ERR125037        | Finland           | (36)        |
| Hi1247 | Otitis media                          | <i>Haemophilus influenzae</i> | ---                         | N/A                   |            | ERR125038        | Finland           | (36)        |
| Hi1268 | Otitis media                          | <i>Haemophilus influenzae</i> | ---                         | N/A                   |            | ERR125039        | Finland           | (36)        |
| Hi1363 | Otitis media                          | <i>Haemophilus influenzae</i> | ---                         | N/A                   |            | ERR125043        | Finland           | (36)        |
| Hi1388 | Ear                                   | <i>Haemophilus influenzae</i> | ---                         | 3A                    |            | LFDN00000000     | USA               | (31)        |
| Hi1413 | Ear                                   | <i>Haemophilus influenzae</i> | ---                         | N/A                   |            | LHSM00000000     | USA               | (31)        |
| Hi1426 | Cerebrospinal fluid                   | <i>Haemophilus influenzae</i> | ---                         | 1396B                 |            | LFDL00000000     | USA               | (31)        |
| Hi1500 | Chronic obstructive pulmonary disease | <i>Haemophilus influenzae</i> | ---                         | N/A                   |            | ERR125069        | Spain             | (36)        |
| Hi1513 | Chronic obstructive pulmonary disease | <i>Haemophilus influenzae</i> | ---                         | N/A                   |            | ERR125070        | Spain             | (36)        |
| Hi1549 | Chronic obstructive pulmonary disease | <i>Haemophilus influenzae</i> | ---                         | N/A                   |            | ERR125071        | Spain             | (36)        |
| Hi1553 | Chronic obstructive pulmonary disease | <i>Haemophilus influenzae</i> | ---                         | N/A                   |            | ERR125072        | Spain             | (36)        |
| Hi1556 | Chronic obstructive pulmonary disease | <i>Haemophilus influenzae</i> | ---                         | N/A                   |            | ERR125073        | Spain             | (36)        |
| Hi1557 | Chronic obstructive pulmonary disease | <i>Haemophilus influenzae</i> | ---                         | N/A                   |            | ERR125074        | Spain             | (36)        |
| Hi1558 | Chronic obstructive pulmonary disease | <i>Haemophilus influenzae</i> | ---                         | N/A                   |            | ERR125075        | Spain             | (36)        |
| Hi1559 | Chronic obstructive pulmonary disease | <i>Haemophilus influenzae</i> | ---                         | N/A                   |            | ERR125076        | Spain             | (36)        |
| Hi1560 | Chronic obstructive pulmonary disease | <i>Haemophilus influenzae</i> | ---                         | N/A                   |            | ERR125077        | Spain             | (36)        |
| Hi1566 | Chronic obstructive pulmonary disease | <i>Haemophilus influenzae</i> | ---                         | N/A                   |            | ERR125078        | Spain             | (36)        |
| Hi1568 | Chronic obstructive pulmonary disease | <i>Haemophilus influenzae</i> | ---                         | N/A                   |            | ERR125079        | Spain             | (36)        |

| Strain | Source                                | Original species designation  | Revised species designation | Alternative strain ID | Haemolysis | Accession number | Country of origin | Reference   |
|--------|---------------------------------------|-------------------------------|-----------------------------|-----------------------|------------|------------------|-------------------|-------------|
| Hi16   | Carriage                              | <i>Haemophilus influenzae</i> | ---                         | N/A                   |            | ERR125053        | Finland           | (36)        |
| Hi1606 | Chronic obstructive pulmonary disease | <i>Haemophilus influenzae</i> | ---                         | N/A                   |            | ERR125080        | Spain             | (36)        |
| Hi1607 | Chronic obstructive pulmonary disease | <i>Haemophilus influenzae</i> | ---                         | N/A                   |            | ERR125081        | Spain             | (36)        |
| Hi1619 | Chronic obstructive pulmonary disease | <i>Haemophilus influenzae</i> | ---                         | N/A                   |            | ERR125082        | Spain             | (36)        |
| Hi162  | Otitis media                          | <i>Haemophilus influenzae</i> | ---                         | N/A                   |            | ERR125020        | Finland           | (36)        |
| Hi1621 | Chronic obstructive pulmonary disease | <i>Haemophilus influenzae</i> | ---                         | N/A                   |            | ERR125083        | Spain             | (36)        |
| Hi1622 | Chronic obstructive pulmonary disease | <i>Haemophilus influenzae</i> | ---                         | N/A                   |            | ERR125084        | Spain             | (36)        |
| Hi1623 | Chronic obstructive pulmonary disease | <i>Haemophilus influenzae</i> | ---                         | N/A                   |            | ERR125085        | Spain             | (36)        |
| Hi1630 | Chronic obstructive pulmonary disease | <i>Haemophilus influenzae</i> | ---                         | N/A                   |            | ERR125086        | Spain             | (36)        |
| Hi167  | Otitis media                          | <i>Haemophilus influenzae</i> | ---                         | N/A                   |            | ERR125050        | Finland           | (36)        |
| Hi17   | Carriage                              | <i>Haemophilus influenzae</i> | ---                         | N/A                   |            | ERR125054        | Finland           | (36)        |
| Hi176  | Otitis media                          | <i>Haemophilus influenzae</i> | ---                         | N/A                   |            | ERR125021        | Finland           | (36)        |
| Hi177  | Carriage                              | <i>Haemophilus influenzae</i> | ---                         | N/A                   |            | ERR125057        | Finland           | (36)        |
| Hi1980 | Blood                                 | <i>Haemophilus influenzae</i> | ---                         | N/A                   |            | NZ_LFFO00000000  | USA               | (32)        |
| Hi199  | Otitis media                          | <i>Haemophilus influenzae</i> | ---                         | N/A                   |            | ERR125049        | Finland           | (36)        |
| Hi2019 | Otitis media                          | <i>Haemophilus influenzae</i> | ---                         | N/A                   |            | ERR125041        | Finland           | (36)        |
| Hi206  | Otitis media                          | <i>Haemophilus influenzae</i> | ---                         | N/A                   |            | ERR125045        | Finland           | (36)        |
| Hi2192 | ---                                   | <i>Haemophilus influenzae</i> | ---                         | N/A                   |            | NZ_LHSN00000000  | USA               | Unpublished |
| Hi24   | Carriage                              | <i>Haemophilus influenzae</i> | ---                         | N/A                   |            | ERR125055        | Finland           | (36)        |
| Hi2428 | ---                                   | <i>Haemophilus influenzae</i> | ---                         | N/A                   |            | NZ_LHSO00000000  | USA               | Unpublished |
| Hi264  | Carriage                              | <i>Haemophilus influenzae</i> | ---                         | N/A                   |            | ERR125058        | Finland           | (36)        |
| Hi285  | Otitis media                          | <i>Haemophilus influenzae</i> | ---                         | N/A                   |            | ERR125022        | Finland           | (36)        |
| Hi322  | Cerebrospinal fluid                   | <i>Haemophilus influenzae</i> | ---                         | N/A                   |            | NZ_JXLX00000000  | Italy             | (33)        |
| Hi345  | Blood                                 | <i>Haemophilus influenzae</i> | ---                         | N/A                   |            | NZ_JXLY00000000  | Italy             | (33)        |
| Hi359  | Blood                                 | <i>Haemophilus influenzae</i> | ---                         | N/A                   |            | NZ_JXLZ00000000  | Italy             | (33)        |
| Hi361  | Blood                                 | <i>Haemophilus influenzae</i> | ---                         | N/A                   |            | NZ_JXMA00000000  | Italy             | (33)        |
| Hi375  | Otitis media                          | <i>Haemophilus influenzae</i> | ---                         | N/A                   |            | ERR125023        | Finland           | (36)        |
| Hi378  | Cerebrospinal fluid                   | <i>Haemophilus influenzae</i> | ---                         | N/A                   |            | NZ_JXMB00000000  | Italy             | (33)        |

| Strain  | Source                                | Original species designation  | Revised species designation | Alternative strain ID | Haemolysis | Accession number | Country of origin | Reference |
|---------|---------------------------------------|-------------------------------|-----------------------------|-----------------------|------------|------------------|-------------------|-----------|
| Hi381   | Cerebrospinal fluid                   | <i>Haemophilus influenzae</i> | ---                         | N/A                   |            | NZ_JXMC00000000  | Italy             | (33)      |
| Hi394   | Blood                                 | <i>Haemophilus influenzae</i> | ---                         | N/A                   |            | NZ_JXMD00000000  | Italy             | (33)      |
| Hi403   | Cerebrospinal fluid                   | <i>Haemophilus influenzae</i> | ---                         | N/A                   |            | NZ_JXME00000000  | Italy             | (33)      |
| Hi411   | Sputum                                | <i>Haemophilus influenzae</i> | ---                         | N/A                   |            | NZ_JFZK00000000  | Spain             | (30)      |
| Hi432   | Otitis media                          | <i>Haemophilus influenzae</i> | ---                         | N/A                   |            | ERR125024        | Finland           | (36)      |
| Hi443   | Carriage                              | <i>Haemophilus influenzae</i> | ---                         | N/A                   |            | ERR125059        | Finland           | (36)      |
| Hi477   | Otitis media                          | <i>Haemophilus influenzae</i> | ---                         | N/A                   |            | ERR125025        | Finland           | (36)      |
| Hi486   | Otitis media                          | <i>Haemophilus influenzae</i> | ---                         | N/A                   |            | ERR125026        | Finland           | (36)      |
| Hi492   | Carriage                              | <i>Haemophilus influenzae</i> | ---                         | N/A                   |            | ERR125060        | Finland           | (36)      |
| Hi525   | Carriage                              | <i>Haemophilus influenzae</i> | ---                         | N/A                   |            | ERR125061        | Finland           | (36)      |
| Hi584   | Sputum                                | <i>Haemophilus influenzae</i> | ---                         | N/A                   |            | NZ_JFZL00000000  | Spain             | (30)      |
| Hi609   | Carriage                              | <i>Haemophilus influenzae</i> | ---                         | N/A                   |            | ERR125062        | Finland           | (36)      |
| Hi639   | Otitis media                          | <i>Haemophilus influenzae</i> | ---                         | N/A                   |            | ERR125044        | Finland           | (36)      |
| Hi658   | Otitis media                          | <i>Haemophilus influenzae</i> | ---                         | N/A                   |            | ERR125046        | Finland           | (36)      |
| Hi667   | Otitis media                          | <i>Haemophilus influenzae</i> | ---                         | N/A                   |            | ERR125027        | Finland           | (36)      |
| Hi709   | Carriage                              | <i>Haemophilus influenzae</i> | ---                         | N/A                   |            | ERR125063        | Finland           | (36)      |
| Hi723   | Otitis media                          | <i>Haemophilus influenzae</i> | ---                         | N/A                   |            | ERR125028        | Finland           | (36)      |
| Hi740   | Otitis media                          | <i>Haemophilus influenzae</i> | ---                         | N/A                   |            | ERR125048        | Finland           | (36)      |
| Hi787   | Carriage                              | <i>Haemophilus influenzae</i> | ---                         | N/A                   |            | ERR125064        | Finland           | (36)      |
| Hi794   | Carriage                              | <i>Haemophilus influenzae</i> | ---                         | N/A                   |            | ERR125065        | Finland           | (36)      |
| Hi805   | Carriage                              | <i>Haemophilus influenzae</i> | ---                         | N/A                   |            | ERR125066        | Finland           | (36)      |
| Hi88    | Carriage                              | <i>Haemophilus influenzae</i> | ---                         | N/A                   |            | ERR125056        | Finland           | (36)      |
| Hi968   | Chronic obstructive pulmonary disease | <i>Haemophilus influenzae</i> | ---                         | N/A                   |            | ERR125067        | Spain             | (36)      |
| Hi973   | Otitis media                          | <i>Haemophilus influenzae</i> | ---                         | N/A                   |            | ERR125047        | Finland           | (36)      |
| Hi981   | Otitis media                          | <i>Haemophilus influenzae</i> | ---                         | N/A                   |            | ERR125029        | Finland           | (36)      |
| KR494   | Necrotising Myositis                  | <i>Haemophilus influenzae</i> | ---                         | N/A                   |            | NC_022356        | Sweden            | (34)      |
| MiHi270 | Nasopharynx                           | <i>Haemophilus influenzae</i> | ---                         | N/A                   |            | NZ_JXMF00000000  | Italy             | (33)      |
| MiHi64  | Nasopharynx                           | <i>Haemophilus influenzae</i> | ---                         | N/A                   |            | NZ_JXMG00000000  | Italy             | (33)      |



| Strain    | Source       | Original species designation  | Revised species designation | Alternative strain ID     | Haemolysis | Accession number | Country of origin | Reference   |
|-----------|--------------|-------------------------------|-----------------------------|---------------------------|------------|------------------|-------------------|-------------|
| NCTC 8143 | ---          | <i>Haemophilus influenzae</i> | ---                         | ATCC 33391; DSM 4690; 680 |            | LN831035         | UK                | Unpublished |
| NT127     | ---          | <i>Haemophilus influenzae</i> | ---                         | N/A                       |            | NZ_ACSL00000000  | USA               | Unpublished |
| PittAA    | Otitis media | <i>Haemophilus influenzae</i> | ---                         | CGSHIAA                   |            | NZ_AAZG00000000  | USA               | (27)        |
| PittEE    | Otitis media | <i>Haemophilus influenzae</i> | ---                         | CGSHIEE                   |            | NC_009566        | USA               | (27)        |
| PittHH    | Otitis media | <i>Haemophilus influenzae</i> | ---                         | CGSHIHH                   |            | NZ_AAZH00000000  | USA               | (27)        |
| PittII    | Otorrhea     | <i>Haemophilus influenzae</i> | ---                         | CGSHIII                   |            | NZ_AAZI00000000  | USA               | (27)        |
| R2846     | ---          | <i>Haemophilus influenzae</i> | ---                         | N/A                       |            | NC_017452        | USA               | Unpublished |
| R2866     | ---          | <i>Haemophilus influenzae</i> | ---                         | N/A                       |            | NC_017451        | USA               | Unpublished |
| Rd KW20   | ---          | <i>Haemophilus influenzae</i> | ---                         | N/A                       |            | NC_000907        | Undetermined      | (35)        |
| RdAW      | ---          | <i>Haemophilus influenzae</i> | ---                         | N/A                       |            | NZ_ACSM00000000  | Undetermined      | Unpublished |
| RM600672  | Other        | <i>Haemophilus influenzae</i> | ---                         | N/A                       |            | ERR125088        | Undetermined      | (36)        |
| RM601173  | Invasive     | <i>Haemophilus influenzae</i> | ---                         | N/A                       |            | ERR125089        | UK                | (36)        |
| RM601974  | Invasive     | <i>Haemophilus influenzae</i> | ---                         | N/A                       |            | ERR125090        | UK                | (36)        |
| RM603375  | Other        | <i>Haemophilus influenzae</i> | ---                         | N/A                       |            | ERR125091        | UK                | (36)        |
| RM605177  | Invasive     | <i>Haemophilus influenzae</i> | ---                         | N/A                       |            | ERR125092        | UK                | (36)        |
| RM701878  | Invasive     | <i>Haemophilus influenzae</i> | ---                         | N/A                       |            | ERR125110        | Ghana             | (36)        |
| RM702879  | Invasive     | <i>Haemophilus influenzae</i> | ---                         | N/A                       |            | ERR125093        | PNG               | (36)        |
| RM702980  | Invasive     | <i>Haemophilus influenzae</i> | ---                         | N/A                       |            | ERR125094        | PNG               | (36)        |
| RM706883  | Other        | <i>Haemophilus influenzae</i> | ---                         | N/A                       |            | ERR125096        | PNG               | (36)        |
| RM712284  | Invasive     | <i>Haemophilus influenzae</i> | ---                         | N/A                       |            | ERR125097        | Australia         | (36)        |
| RM730885  | Carriage     | <i>Haemophilus influenzae</i> | ---                         | N/A                       |            | ERR125098        | South Korea       | (36)        |
| RM730986  | Carriage     | <i>Haemophilus influenzae</i> | ---                         | N/A                       |            | ERR125099        | South Korea       | (36)        |
| RM734787  | Other        | <i>Haemophilus influenzae</i> | ---                         | N/A                       |            | ERR125100        | USA               | (36)        |
| RM744888  | Invasive     | <i>Haemophilus influenzae</i> | ---                         | N/A                       |            | ERR125101        | Iceland           | (36)        |
| RM745989  | Invasive     | <i>Haemophilus influenzae</i> | ---                         | N/A                       |            | ERR125102        | Iceland           | (36)        |
| RM746590  | Invasive     | <i>Haemophilus influenzae</i> | ---                         | N/A                       |            | ERR125103        | Iceland           | (36)        |
| RM747791  | Other        | <i>Haemophilus influenzae</i> | ---                         | N/A                       |            | ERR125104        | Iceland           | (36)        |
| RM749092  | Invasive     | <i>Haemophilus influenzae</i> | ---                         | N/A                       |            | ERR125105        | RSA               | (36)        |

| Strain   | Source     | Original species designation  | Revised species designation | Alternative strain ID | Haemolysis | Accession number | Country of origin | Reference |
|----------|------------|-------------------------------|-----------------------------|-----------------------|------------|------------------|-------------------|-----------|
| RM761793 | Invasive   | <i>Haemophilus influenzae</i> | ---                         | N/A                   |            | ERR125106        | Malaysia          | (36)      |
| RM763794 | Other      | <i>Haemophilus influenzae</i> | ---                         | N/A                   |            | ERR125107        | China             | (36)      |
| RM787695 | Other      | <i>Haemophilus influenzae</i> | ---                         | N/A                   |            | ERR125108        | Undetermined      | (36)      |
| RMHi93   | Oropharynx | <i>Haemophilus influenzae</i> | ---                         | N/A                   |            | NZ_JXMH00000000  | Italy             | (33)      |

\* Denotes incorrect or incomplete species designations in prior studies

**Table S2.** tBLASTn percentage identity scores of hem genes from the *Haemophilus parainfluenzae* T3T1 genome compared to the haemin-independent *Haemophilus haemolyticus* (hiHh) genomes.

| <b>Isolate</b> | <b>hemA</b> | <b>hemL</b> | <b>hemB</b> | <b>hemC</b> | <b>hemD</b> | <b>hemE</b> | <b>hemN</b> | <b>hemG</b> | <b>hemH</b> |
|----------------|-------------|-------------|-------------|-------------|-------------|-------------|-------------|-------------|-------------|
| 60819_B_Hi1    | 82.19       | 88.46       | 91.76       | 84.47       | 63.67       | 90.4        | 82.86       | 68.86       | 80.5        |
| 60824_B_Hi4    | 81.74       | 88.46       | 91.47       | 85.11       | 63.67       | 90.4        | 83.3        | 71.86       | 80.19       |
| 60971_B_Hi3    | 81.96       | 88.22       | 91.47       | 84.47       | 63.67       | 90.11       | 83.74       | 70.66       | 79.25       |
| 60982_B_Hi1    | 81.74       | 87.98       | 91.47       | 84.79       | 63.27       | 90.68       | 83.08       | 70.66       | 80.5        |
| 65117_B_Hi3    | 81.96       | 88.46       | 91.47       | 84.79       | 63.67       | 89.83       | 83.3        | 70.66       | 79.87       |
| 65151_B_Hi4    | 81.96       | 88.22       | 91.47       | 84.47       | 63.67       | 90.11       | 83.74       | 70.66       | 79.25       |
| 839_HINF       | 82.19       | 88.22       | 91.76       | 84.47       | 63.27       | 90.4        | 82.86       | 70.66       | 79.87       |
| CCUG_11096     | 81.51       | 88.22       | 91.76       | 84.79       | 64.08       | 90.4        | 82.86       | 70.66       | 80.19       |
| CCUG_15949     | 82.19       | 88.22       | 91.47       | 84.79       | 63.67       | 89.83       | 83.3        | 70.66       | 79.25       |
| CCUG_30218     | 82.19       | 88.46       | 91.76       | 84.79       | 63.67       | 90.11       | 83.08       | 70.66       | 79.87       |
| CCUG_31732     | 81.96       | 88.46       | 91.47       | 85.11       | 63.27       | 90.4        | 82.64       | 69.46       | 79.87       |
| CCUG_66565     | 81.96       | 88.46       | 91.47       | 84.79       | 63.27       | 90.4        | 82.86       | 69.46       | 80.19       |
| F0629          | 82.19       | 88.46       | 91.18       | 85.11       | 64.08       | 90.11       | 83.08       | 70.66       | 78.18       |
| PN24           | 81.96       | 88.46       | 91.76       | 84.14       | 63.67       | 90.4        | 82.42       | 70.06       | 79.19       |

**Table S3.** dN/dS values of *hem* genes.

| Gene        | hiHh <sup>a</sup> | <i>H. parainfluenzae</i> <sup>b</sup> |
|-------------|-------------------|---------------------------------------|
| <i>hemA</i> | 0.098             | 0.060                                 |
| <i>hemL</i> | 0.120             | 0.025                                 |
| <i>hemB</i> | 0.064             | 0.031                                 |
| <i>hemC</i> | 0.181             | 0.055                                 |
| <i>hemD</i> | 0.205             | 0.125                                 |
| <i>hemE</i> | 0.097             | 0.030                                 |
| <i>hemN</i> | 0.103             | 0.041                                 |
| <i>hemG</i> | 0.215             | 0.175                                 |
| <i>hemH</i> | 0.160             | 0.079                                 |

<sup>a</sup> Values determined using gene sequences from the 14 haemin-independent *H. haemolyticus* (hiHh) genomes in this study (Table S1).

<sup>b</sup> Values determined using gene sequences from the 24 *H. parainfluenzae* genomes in this study (Table S1).

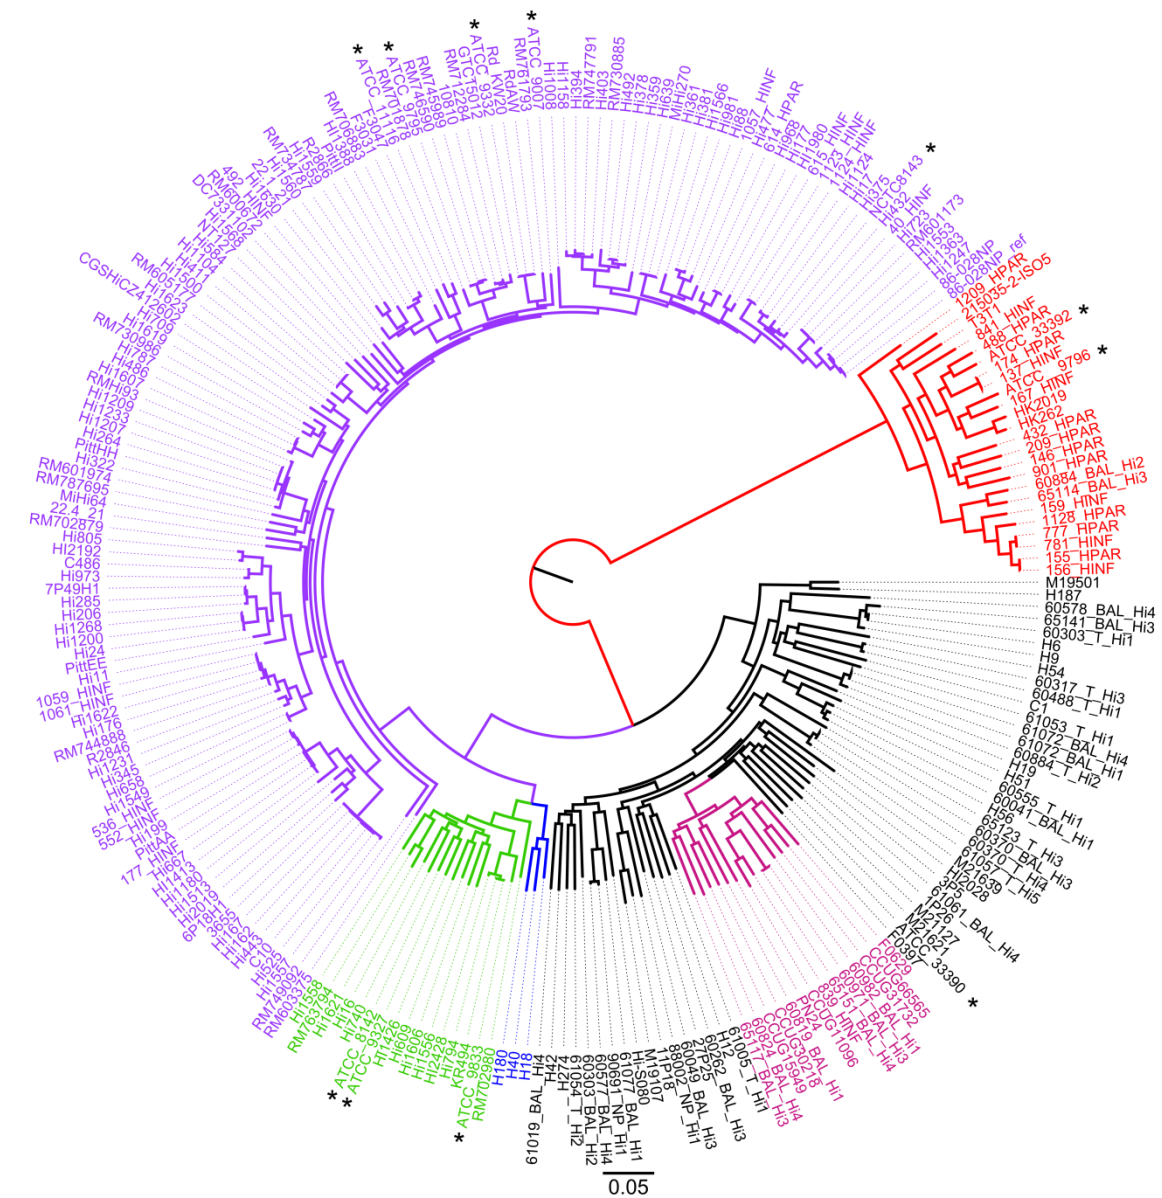

**Figure S1.** Maximum likelihood phylogenomic analysis verifies maximum parsimony phylogenomy. A midpoint-rooted maximum likelihood tree was constructed using 30,345 orthologous biallelic single nucleotide polymorphisms found among 152 *H. influenzae* (purple), including 16 clade I (green) (36) and three *fucP*-negative clade (blue) (17, 18) genomes, 64 *H. haemolyticus* (black) including 14 *hiHh* and “*H. intermedius*” genomes (pink), and 24 *H. parainfluenzae* genomes (red). Type strains are denoted with an asterisk (\*). The scale bar indicates 0.05 substitutions per site.

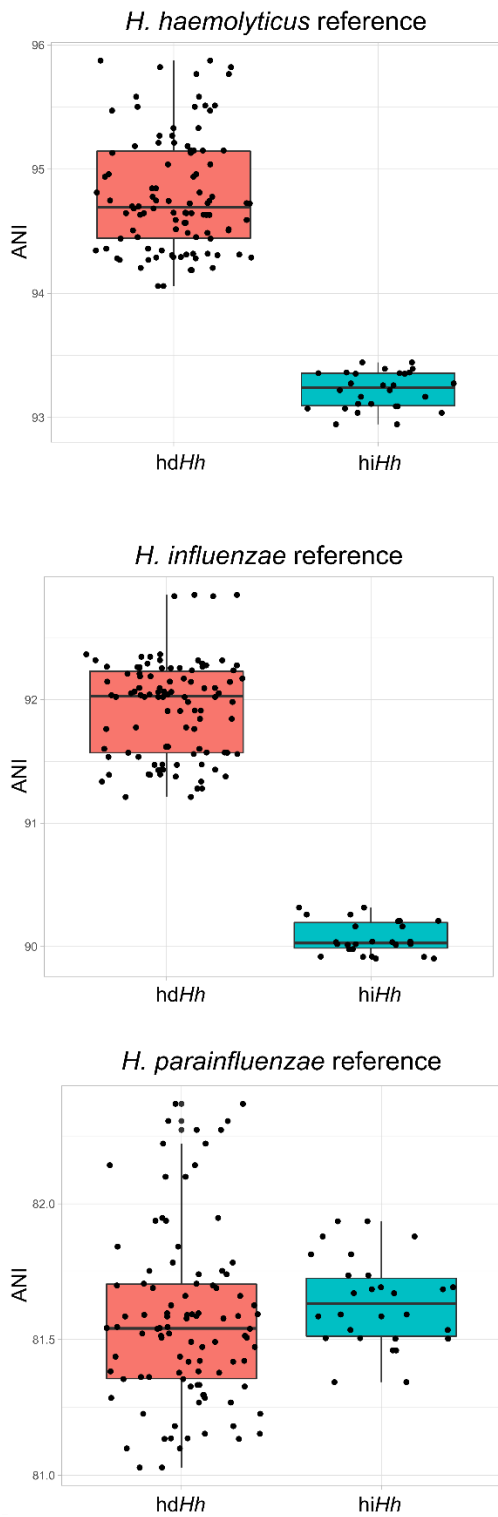

**Figure S2.** Average nucleotide identity values for the 64 *H. haemolyticus* clade genomes with reference to the NCTC 10839 *H. haemolyticus*, 86-028NP non-typeable *H. influenzae*, and T3T1 *H. parainfluenzae* genomes. hdHh, haemin-dependent *H. haemolyticus*; hiHh, haemin-independent *H. haemolyticus*.

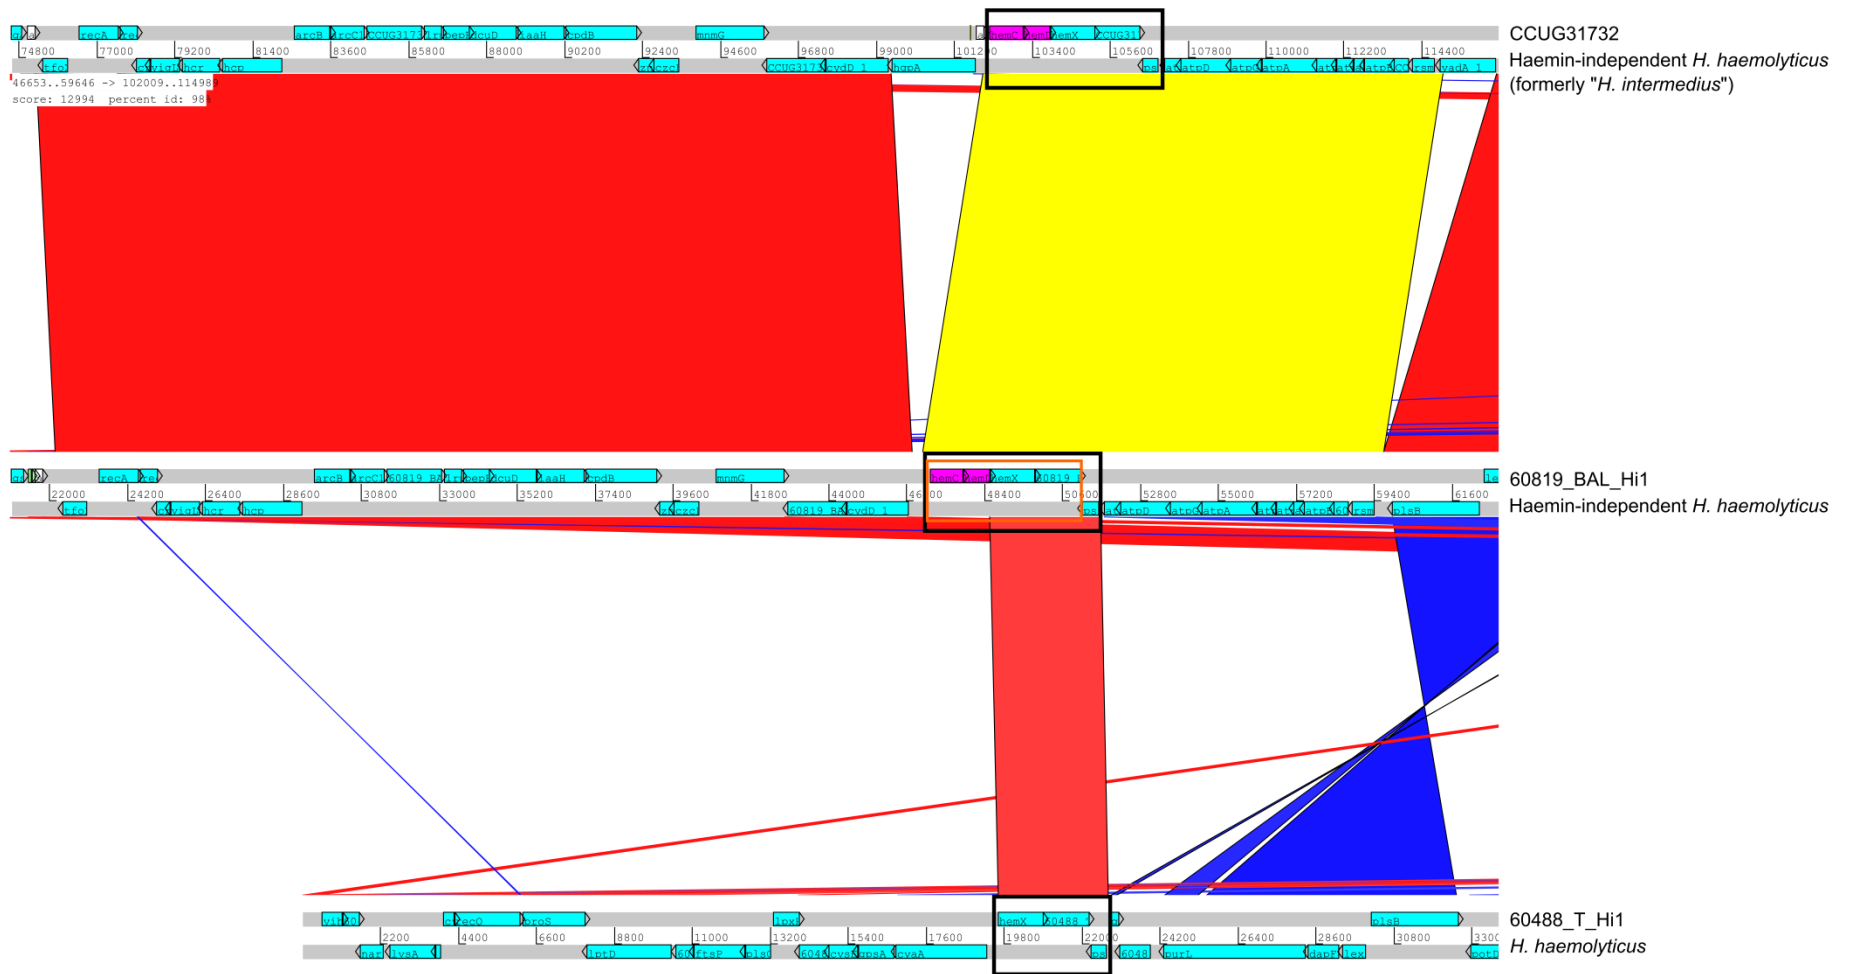

**Figure S3.** Artemis comparison tool alignment of two haemin-independent *Haemophilus haemolyticus* (hiHh) and a haemin-dependent *H. haemolyticus* for visualisation of the syntenic block harbouring *hemC* and *hemD* (black box) predicted by progressiveMAUVE (54). Strain

names and their haemin-dependence are noted beside the respective genome. Coding sequences are indicated by teal blocks containing the PROKKA (45) gene annotation, except for *hemC* and *hemD* (pink). Nucleotide sequence shared between the *hiHh* strain 60819\_BAL\_Hi1 genome and the other two genomes are signified by red (same orientation) or blue (inverted) blocks. The yellow block encompasses the *hemC* and *hemD* genes. The orange box indicates sequence orientation surrounding *hemCD* shared between *hiHh* and *H. parainfluenzae*.



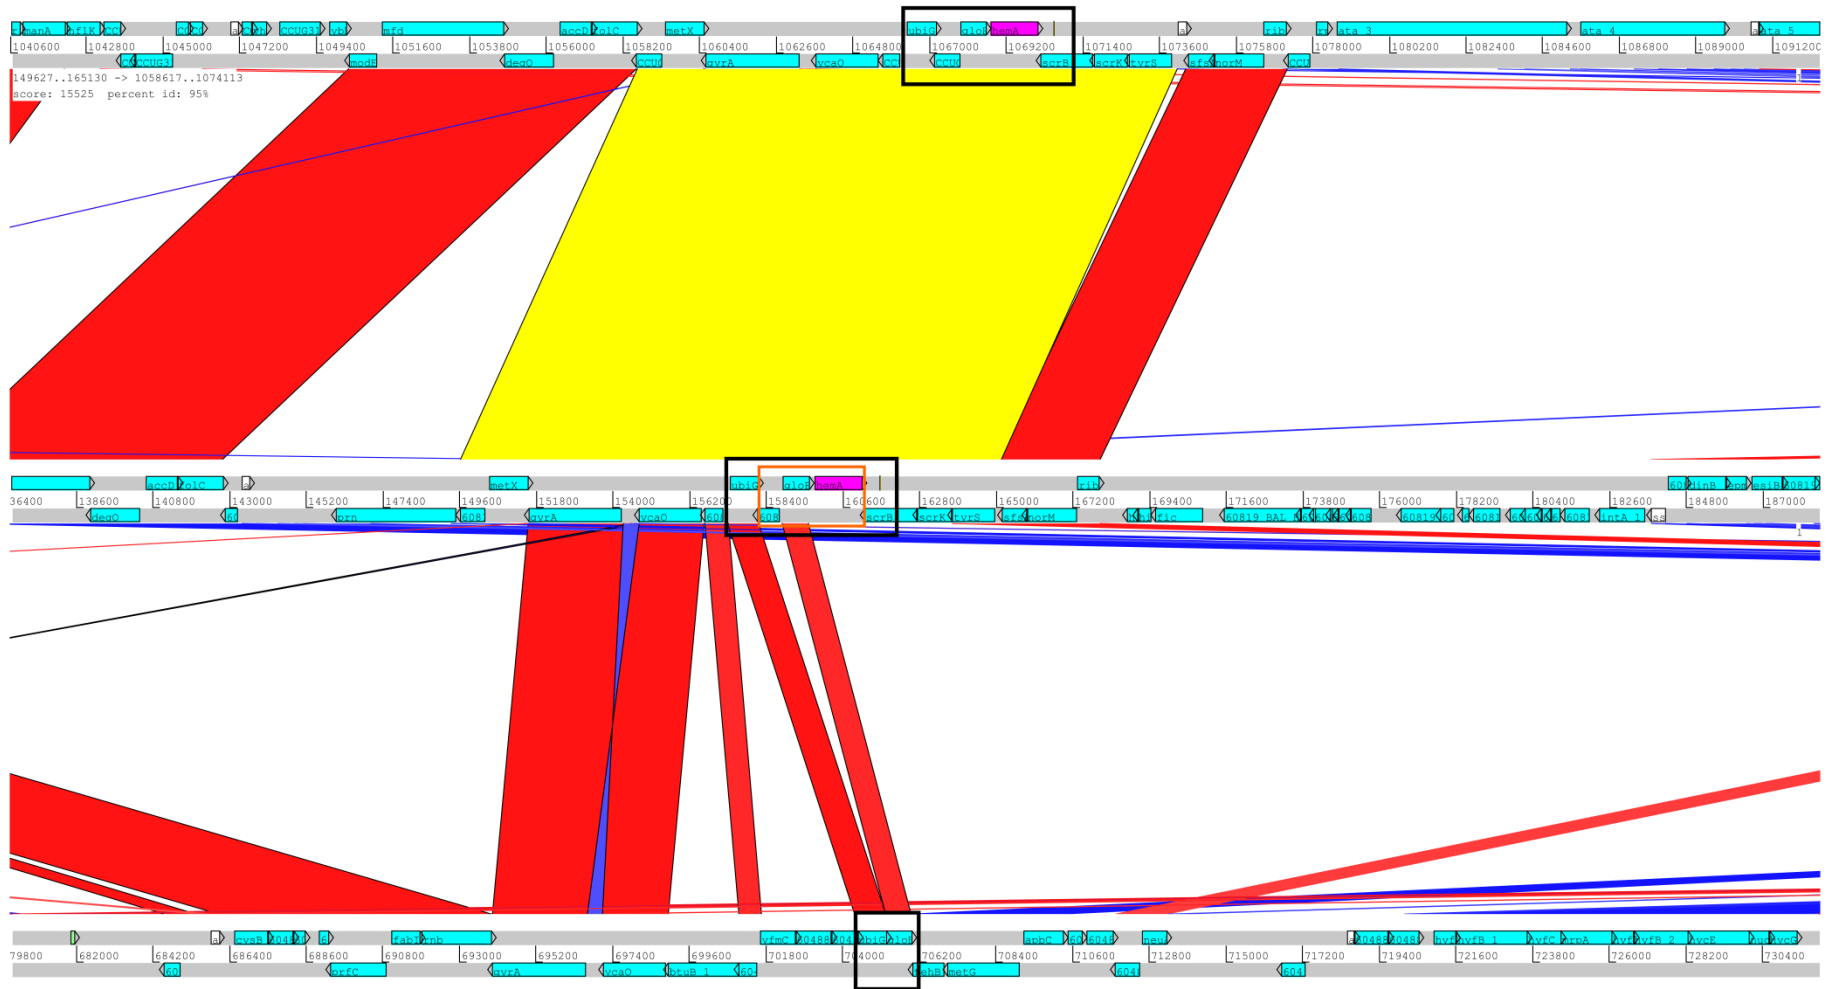

**Figure S4.** Artemis comparison tool alignment of two haemin-independent *Haemophilus haemolyticus* (hiHh) and a haemin-dependent *H. haemolyticus* for visualisation of the *hemA* syntenic block (black box) predicted by progressiveMAUVE (54). Depicted genomes correspond

to the genomes in Figure S3. Coding sequences are indicated by teal blocks containing the PROKKA (45) gene annotation, except for *hemA* (pink). Nucleotide sequence shared between the hiHh strain 60819\_BAL\_Hi1 genome and the other two genomes are signified by red (same orientation) or blue (inverted) blocks. The yellow block encompasses the *hemA* gene. The orange box indicates sequence orientation surrounding *hemA* shared between hiHh and *H. parainfluenzae*.

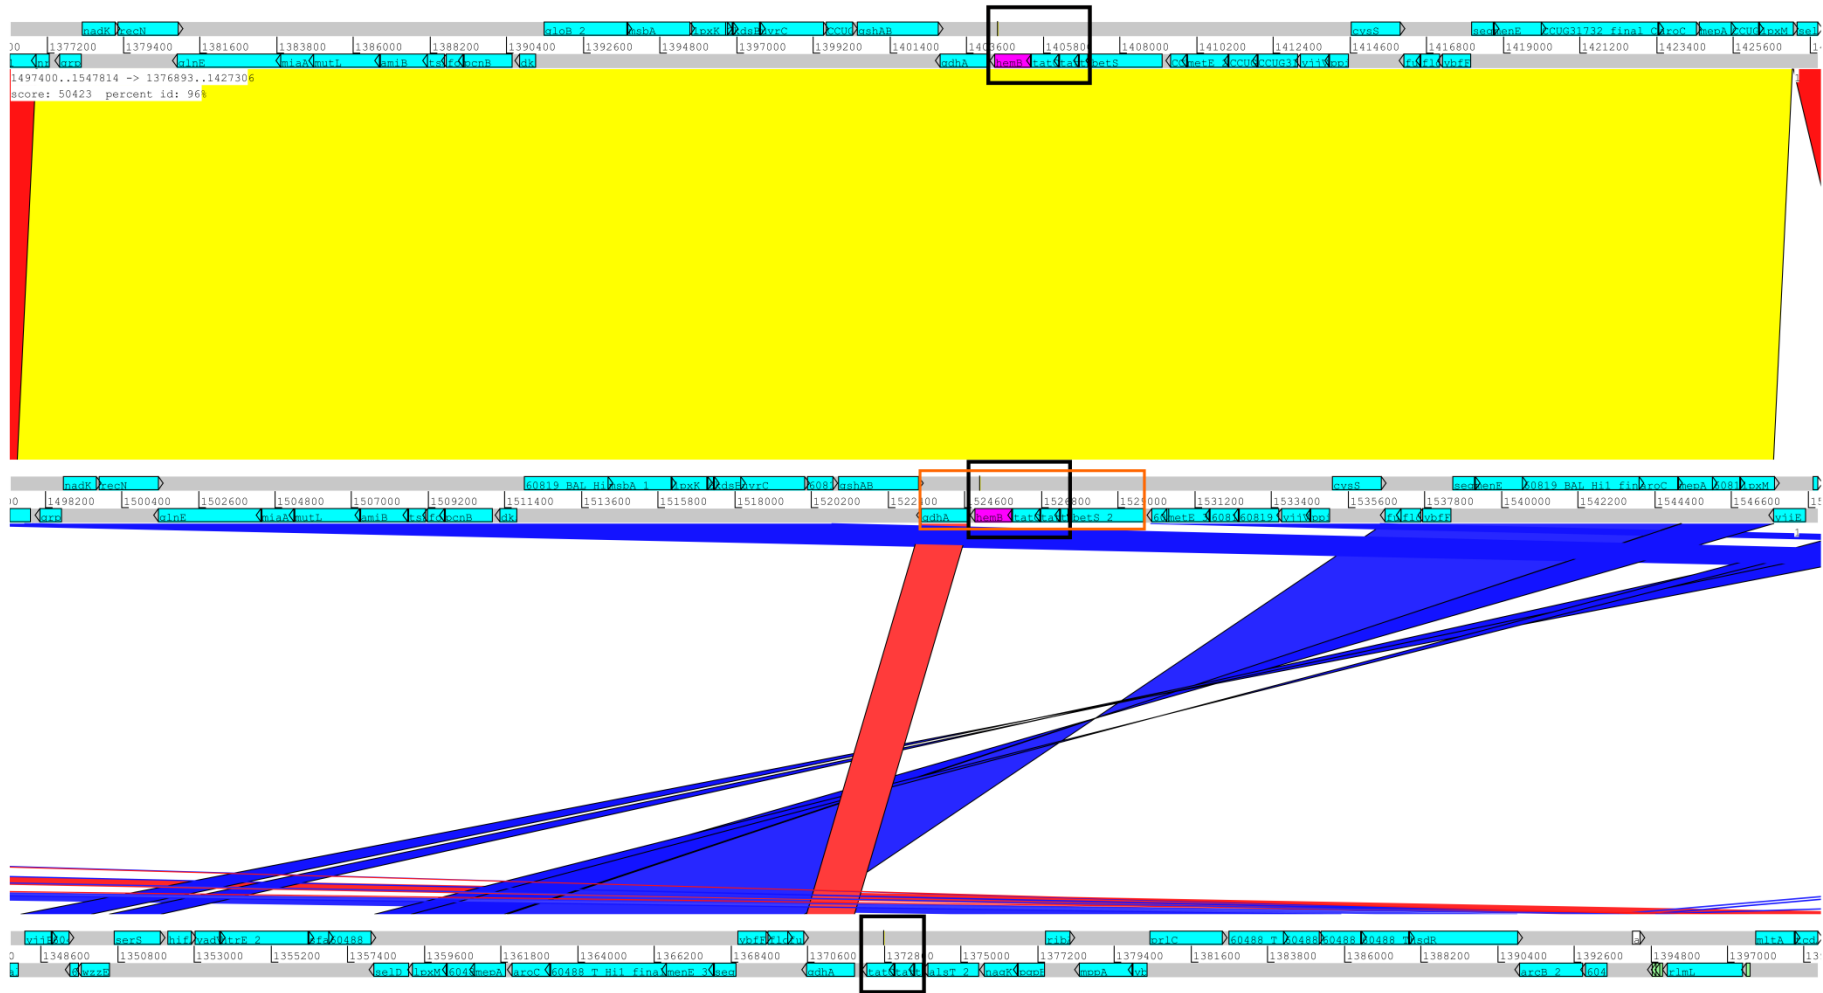

**Figure S5.** Artemis comparison tool alignment of two haemin-independent *Haemophilus haemolyticus* (hiHh) and a haemin-dependent *H. haemolyticus* for visualisation of the *hemB* syntenic block (black box) predicted by progressiveMAUVE (54). Depicted genomes

correspond to the genomes in Figure S3. Coding sequences are indicated by teal blocks containing the PROKKA (45) gene annotation, except for *hemB* (pink). Nucleotide sequence shared between the *hiHh* strain 60819\_BAL\_Hi1 genome and the other two genomes are signified by red (same orientation) or blue (inverted) blocks. The yellow block encompasses the *hemB* gene. The orange box indicates sequence orientation surrounding *hemB* shared between *hiHh* and *H. parainfluenzae*.

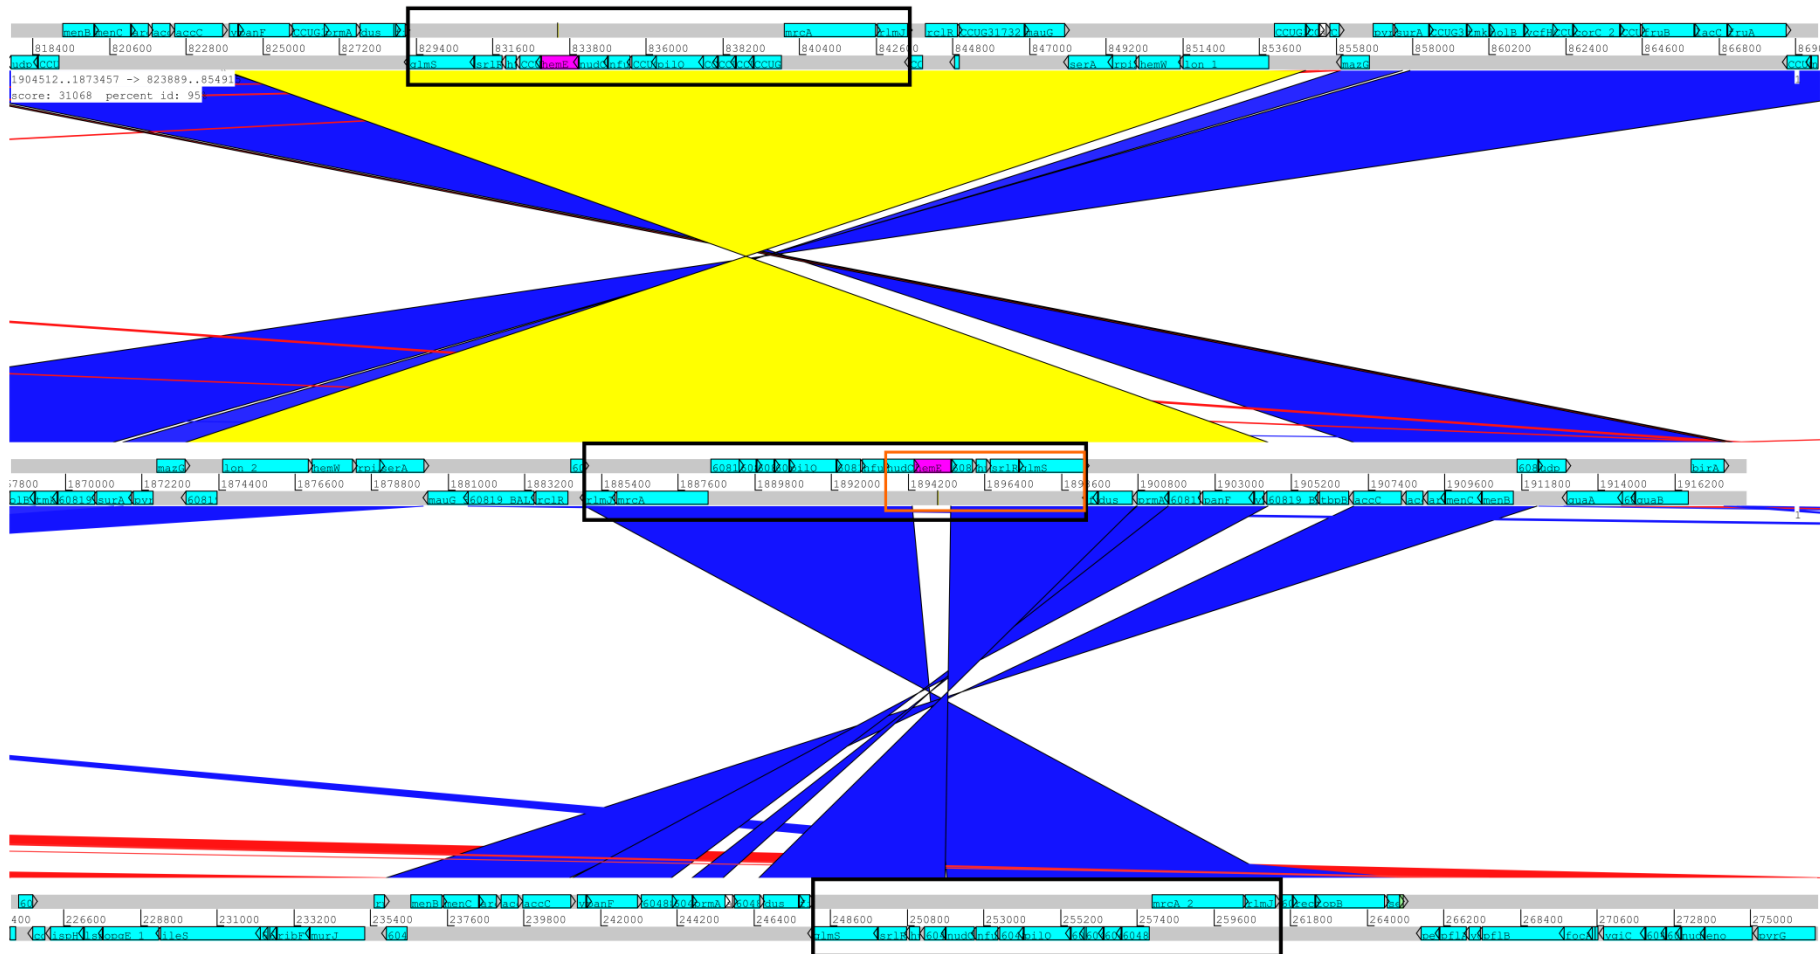

**Figure S6.** Artemis comparison tool alignment of two haemin-independent *Haemophilus haemolyticus* (hiHh) and a haemin-dependent *H. haemolyticus* for visualisation of the *hemE* syntenic block (black box) predicted by progressiveMAUVE (54). Depicted genomes correspond

to the genomes in Figure S3. Coding sequences are indicated by teal blocks containing the PROKKA (45) gene annotation, except for *hemE* (pink). Nucleotide sequence shared between the hiHh strain 60819\_BAL\_Hi1 genome and the other two genomes are signified by red (same orientation) or blue (inverted) blocks. The yellow block encompasses the *hemE* gene. The orange box indicates sequence orientation surrounding *hemE* shared between hiHh and *H. parainfluenzae*.

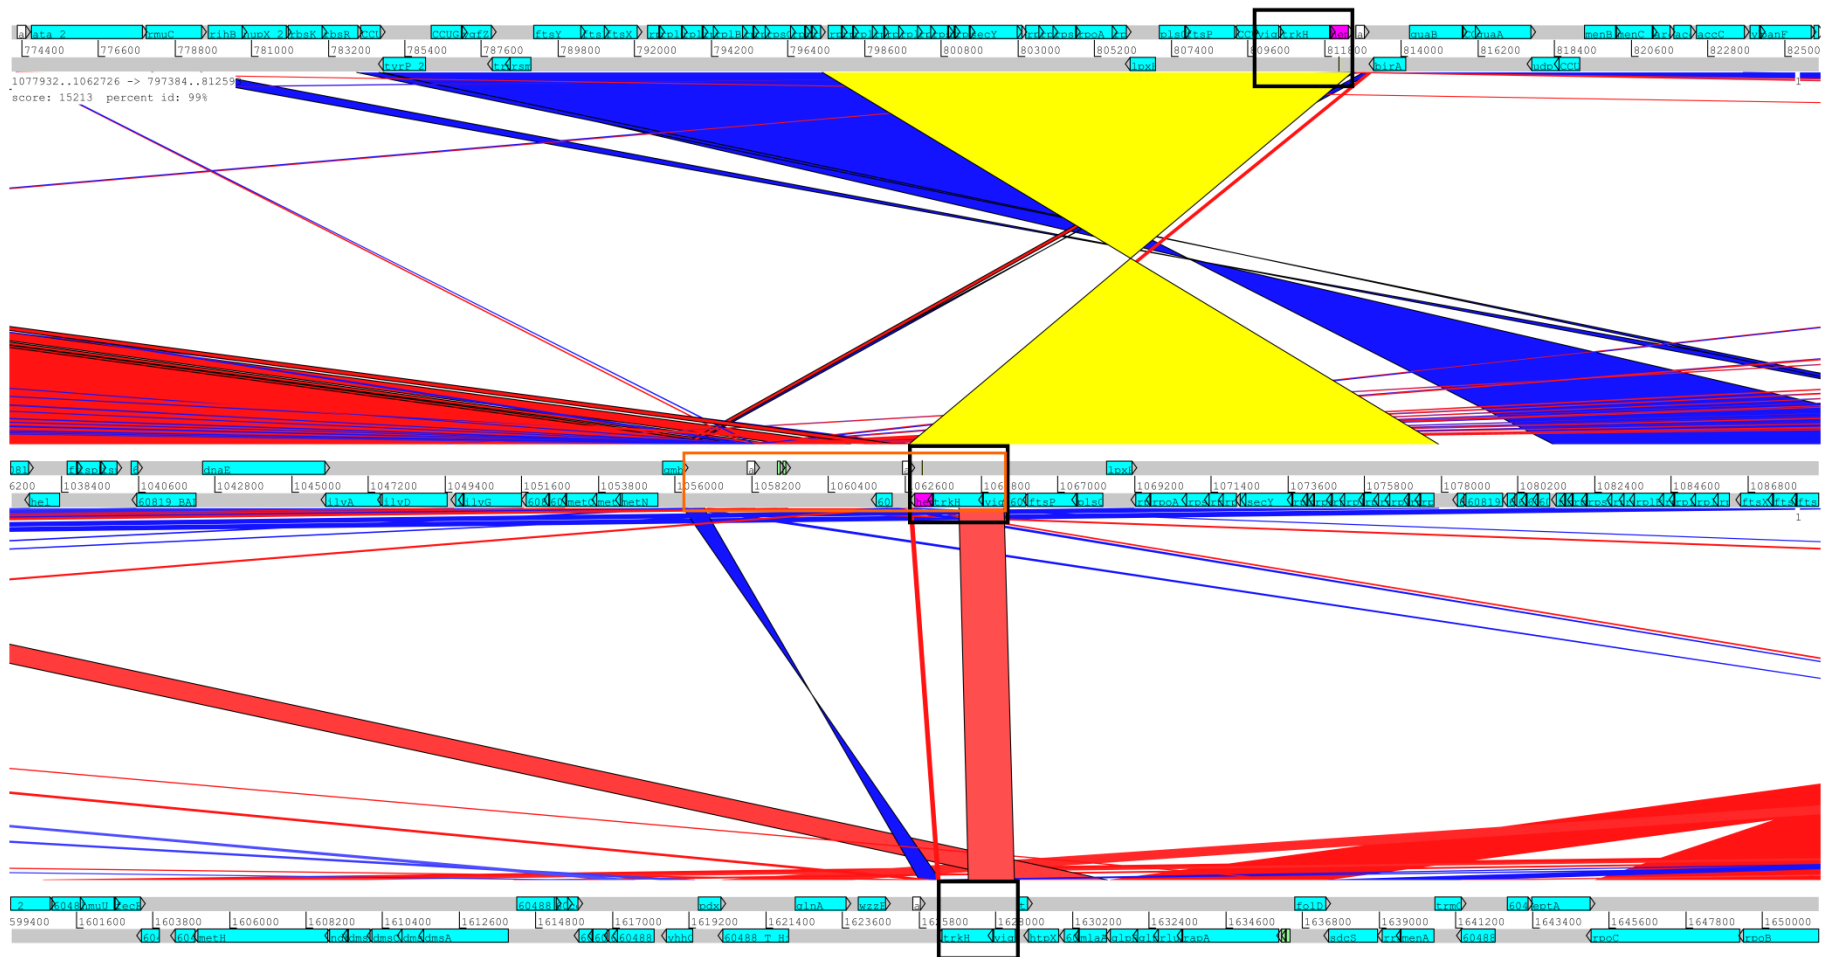

**Figure S7.** Artemis comparison tool alignment of two haemin-independent *Haemophilus haemolyticus* (hiHh) and a haemin-dependent *H. haemolyticus* for visualisation of the *hemG* syntenic block (black box) predicted by progressiveMAUVE (54). Depicted genomes correspond

to the genomes in Figure S3. Coding sequences are indicated by teal blocks containing the PROKKA (45) gene annotation, except for *hemG* (pink). Nucleotide sequence shared between the *hiHh* strain 60819\_BAL\_Hi1 genome and the other two genomes are signified by red (same orientation) or blue (inverted) blocks. The yellow block encompasses the *hemG* gene. The orange box indicates sequence orientation surrounding *hemG* shared between *hiHh* and *H. parainfluenzae*.



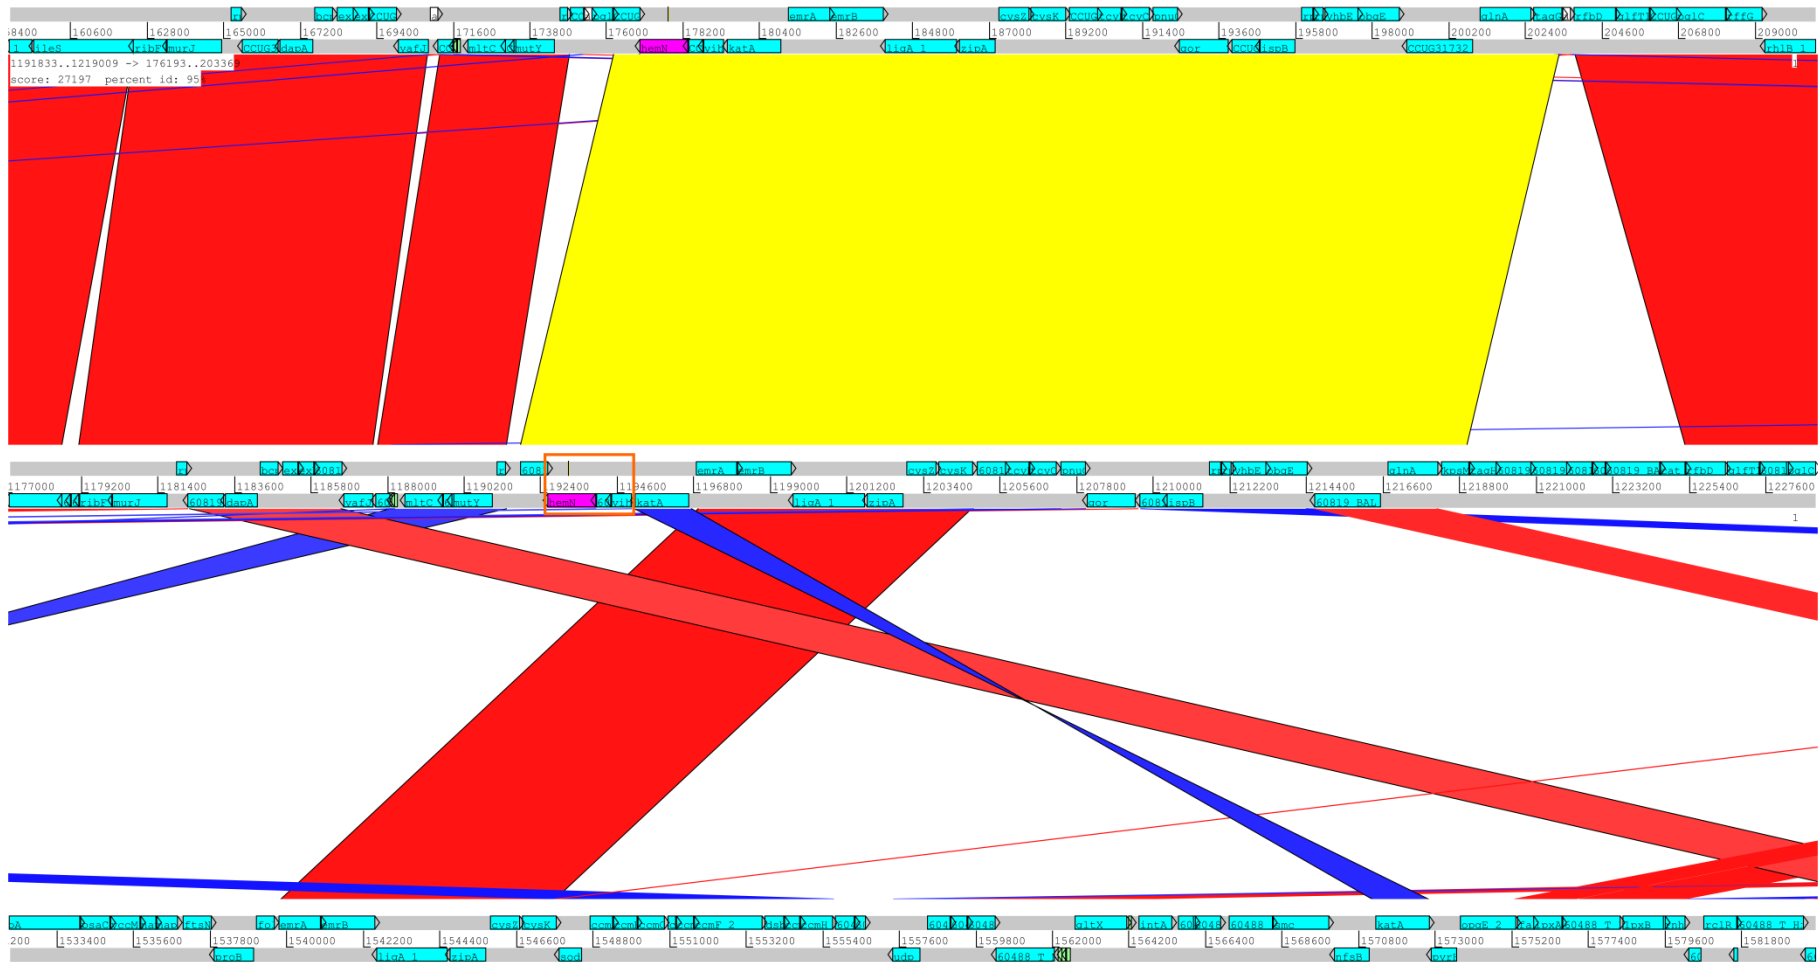

**Figure S8.** Artemis comparison tool alignment of two haemin-independent *Haemophilus haemolyticus* (hiHh) and a haemin-dependent *H. haemolyticus* for visualisation of the genomic region that encompasses *hemN*. Depicted genomes correspond to the genomes in Figure S3.

Coding sequences are indicated by teal blocks containing the PROKKA (45) gene annotation, except for *hemN* (pink). Nucleotide sequence shared between the *hiHh* strain 60819\_BAL\_Hi1 genome and the other two genomes are signified by red (same orientation) or blue (inverted) blocks. The yellow block encompasses the *hemN* gene. The orange box indicates sequence orientation surrounding *hemN* shared between *hiHh* and *H. parainfluenzae*.

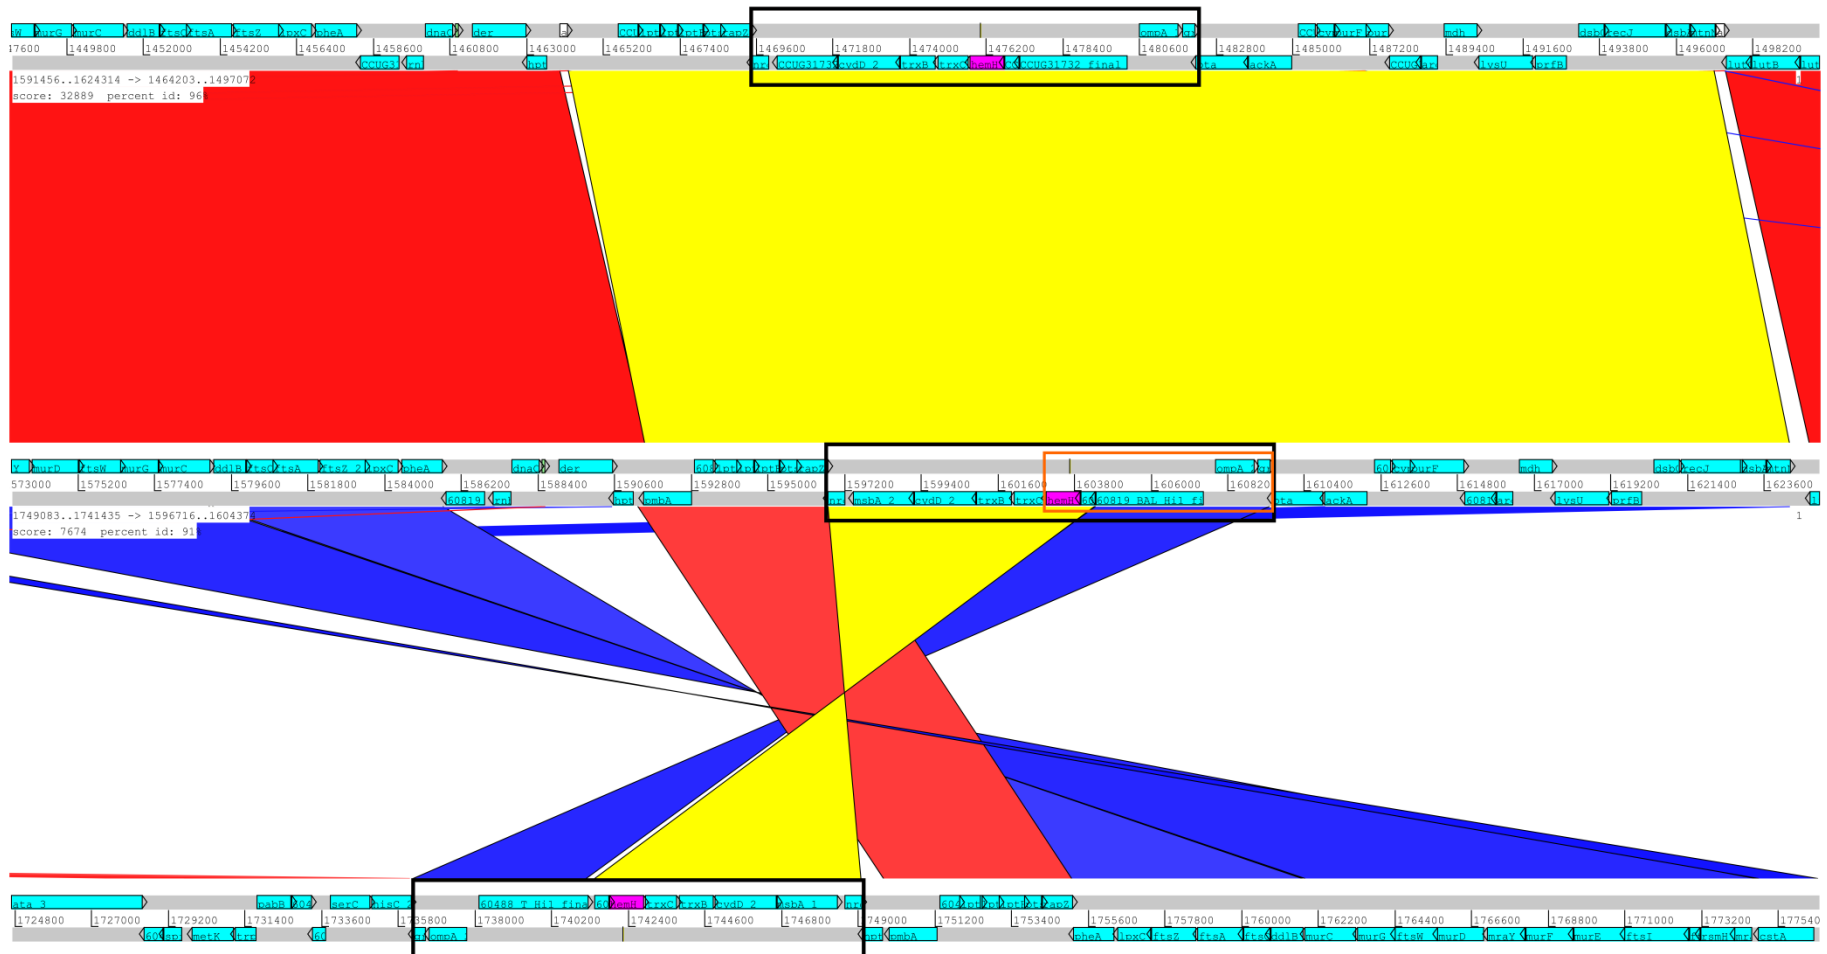

**Figure S9.** Artemis comparison tool alignment of two haemin-independent *Haemophilus haemolyticus* (hiHh) and a haemin-dependent *H. haemolyticus* for visualisation of the *hemH* syntenic block (black box) predicted by progressiveMAUVE (54). Depicted genomes correspond

to the genomes in Figure S3. Coding sequences are indicated by teal blocks containing the PROKKA (45) gene annotation, except for *hemH* (pink). Nucleotide sequence shared between the *hiHh* strain 60819\_BAL\_Hi1 genome and the other two genomes are signified by red (same orientation) or blue (inverted) blocks. The yellow blocks encompass the *hemH* gene. The orange box indicates sequence orientation surrounding *hemH* shared between *hiHh* and *H. parainfluenzae*.

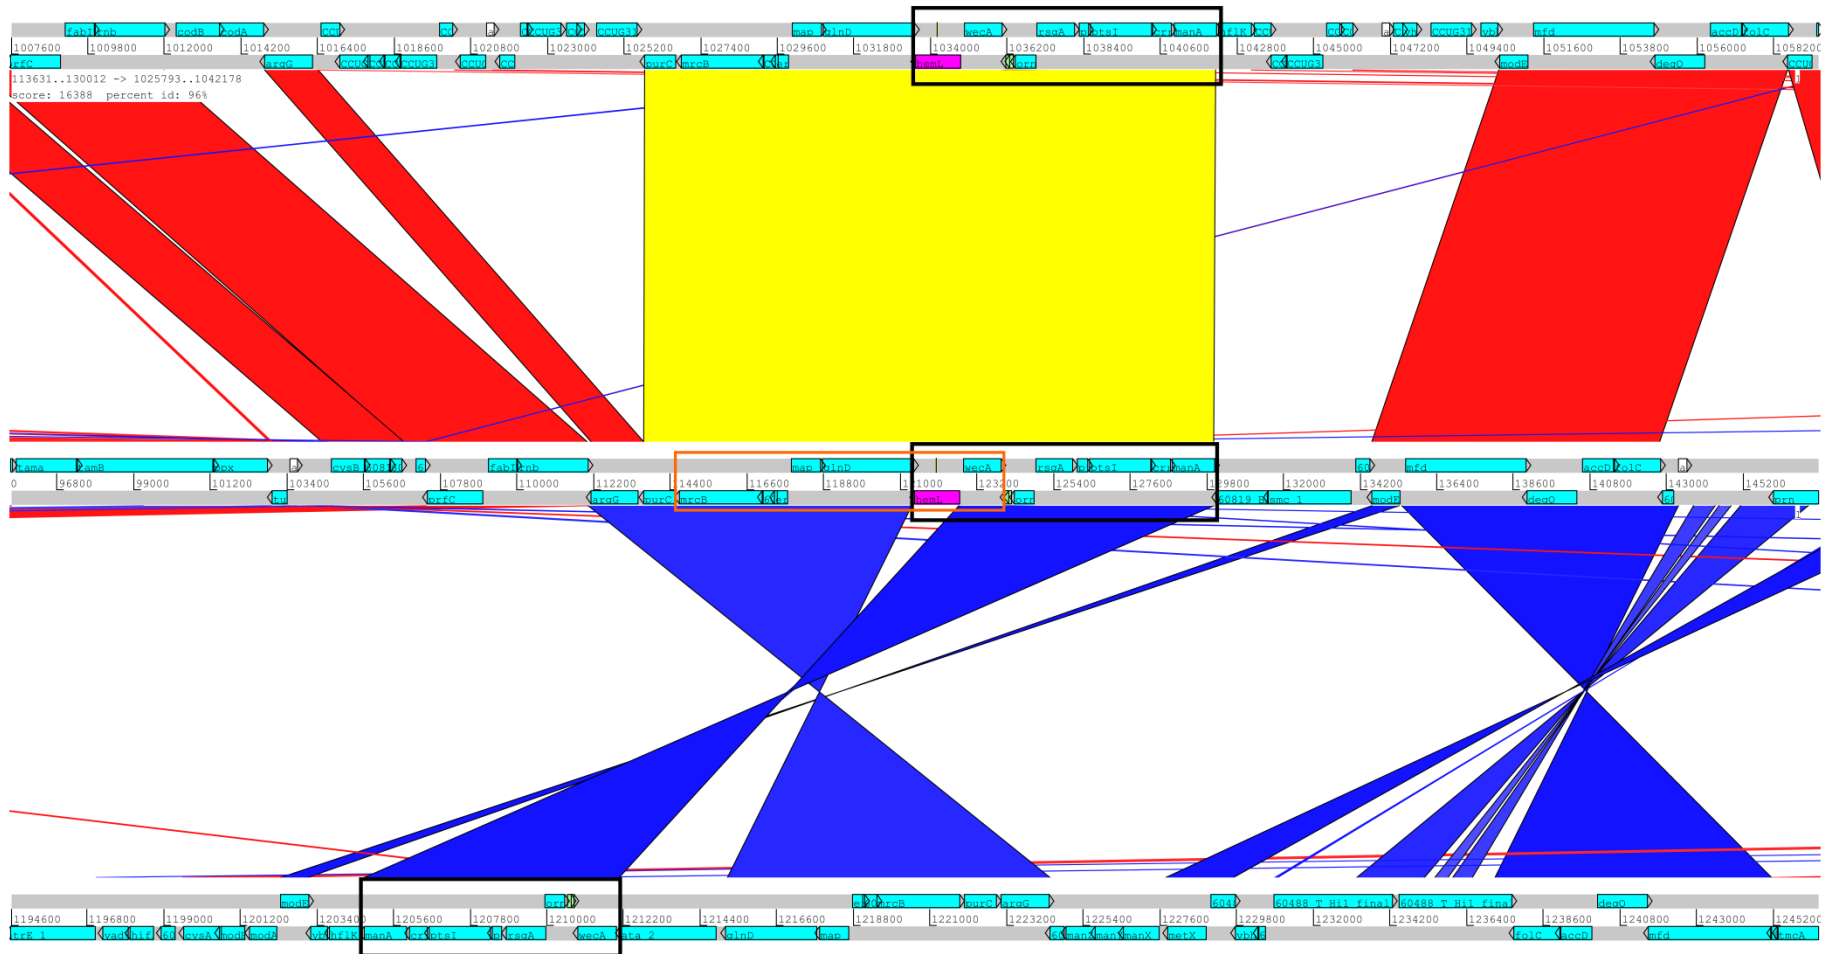

**Figure S10.** Artemis comparison tool alignment of two haemin-independent *Haemophilus haemolyticus* (hiHh) and a haemin-dependent *H. haemolyticus* for visualisation of the *hemL* syntenic block (black box) predicted by progressiveMAUVE (54). Depicted genomes

correspond to the genomes in Figure S3. Coding sequences are indicated by teal blocks containing the PROKKA (45) gene annotation, except for *hemL* (pink). Nucleotide sequence shared between the *hiHh* strain 60819\_BAL\_Hi1 genome and the other two genomes are signified by red (same orientation) or blue (inverted) blocks. The yellow block encompasses the *hemL* gene. The orange box indicates sequence orientation surrounding *hemL* shared between *hiHh* and *H. parainfluenzae*.
